# Supplementary material
Source: PubMed Central journal article supplement (PMC7384744)
Supplement: NIHMS1611274-supplement-Supporting.pdf [file NIHMS1611274-supplement-Supporting.pdf]

## Unsaturation Elements and other Modifications of Phospholipids in Bacteria: New Insight from UVPD Mass Spectrometry

Molly S. Blevins<sup>1</sup>, Virginia K. James<sup>1</sup>, Carmen M. Herrera<sup>2</sup>, Alexandria B. Purcell<sup>2</sup>, M. Stephen Trent<sup>2,3,4</sup>  
and Jennifer S. Brodbelt<sup>1\*</sup>

<sup>1</sup>Department of Chemistry, University of Texas at Austin, Austin, TX 78712

<sup>2</sup>Department of Infectious Diseases, College of Veterinary Medicine, University of Georgia, Athens, GA 30602

<sup>3</sup>Department of Microbiology, College of Arts and Sciences, University of Georgia, Athens, GA 30602

<sup>4</sup>Center for Vaccines and Immunology, University of Georgia, Athens, GA 30602

\*Corresponding author: jbrodbelt@cm.utexas.edu

### Supporting Information

#### Table of Contents

| Content                                                                                                                                                            | Page no. |
|--------------------------------------------------------------------------------------------------------------------------------------------------------------------|----------|
| Fig S1. Base peak LC-MS traces of bacterial lipid extracts                                                                                                         | S2       |
| Fig S2. Omega vs. delta nomenclature for classification of GPL unsaturation elements                                                                               | S3       |
| Fig S3. Chromatographic separation of hydroxyl lipids and their non-hydroxyl isobaric counterparts                                                                 | S4       |
| Fig S4. Possible headgroup structures for Me-PS headgroup                                                                                                          | S5       |
| Fig S5. <i>P. aeruginosa</i> lipid extract base peak LC-MS trace with XIC of Me-PS lipid                                                                           | S6       |
| Fig S6. <i>C. jejuni</i> lipid extract base peak LC-MS trace with XIC of lysyl-PG lipid                                                                            | S7       |
| Table S1. List of investigated bacterial lipid extracts                                                                                                            | S8       |
| Table S2. List of identified unsaturated lipids in <i>E. coli</i> lipid extract with <i>m/z</i> and ppm error values                                               | S9       |
| Table S3. List of identified unsaturated lipids in <i>E. cloacae</i> lipid extract with <i>m/z</i> and ppm error values                                            | S10      |
| Table S4. List of identified unsaturated lipids in <i>K. pneumoniae</i> lipid extract with <i>m/z</i> and ppm error values                                         | S11      |
| Table S5. List of identified unsaturated lipids in <i>P. mirabilis</i> lipid extract with <i>m/z</i> and ppm error values                                          | S12      |
| Table S6. List of identified unsaturated lipids in <i>P. aeruginosa</i> lipid extract with <i>m/z</i> and ppm error values                                         | S13      |
| Table S7. List of identified unsaturated lipids in <i>S. typhimurium</i> lipid extract with <i>m/z</i> and ppm error values                                        | S14      |
| Table S8. List of identified unsaturated lipids in <i>V. cholerae</i> lipid extract with <i>m/z</i> and ppm error values                                           | S15      |
| Table S9. List of identified unsaturated lipids in <i>S. marcescens</i> lipid extract with <i>m/z</i> and ppm error values                                         | S16      |
| Table S10. List of identified unsaturated lipids in <i>C. jejuni</i> lipid extract with <i>m/z</i> and ppm error values                                            | S17      |
| Table S11. List of identified unsaturated lipids in <i>Y. pseudotuberculosis</i> lipid extract with <i>m/z</i> and ppm error values                                | S18      |
| Table S12. List of identified unsaturated lipids in <i>B. subtilis</i> lipid extract with <i>m/z</i> and ppm error values                                          | S19      |
| Table S13. List of identified unsaturated lipids in <i>L. plantarum</i> lipid extract with <i>m/z</i> and ppm error values                                         | S20      |
| Table S14. List of identified PUFAs within GPLs with <i>m/z</i> and ppm error values                                                                               | S21      |
| Table S15. List of identified hydroxyl acyl chains within GPLs <i>m/z</i> and ppm error values                                                                     | S22      |
| Table S16. List of identified OH acyl chains with acyl chain product ion <i>m/z</i> values and <i>m/z</i> values of isobaric unmodified (non-hydroxyl) acyl chains | S23      |
| Table S17. List of lysyl-PGs in Gram-negative <i>C. jejuni</i> and Gram-positive <i>B. subtilis</i> and <i>L. plantarum</i>                                        | S24      |

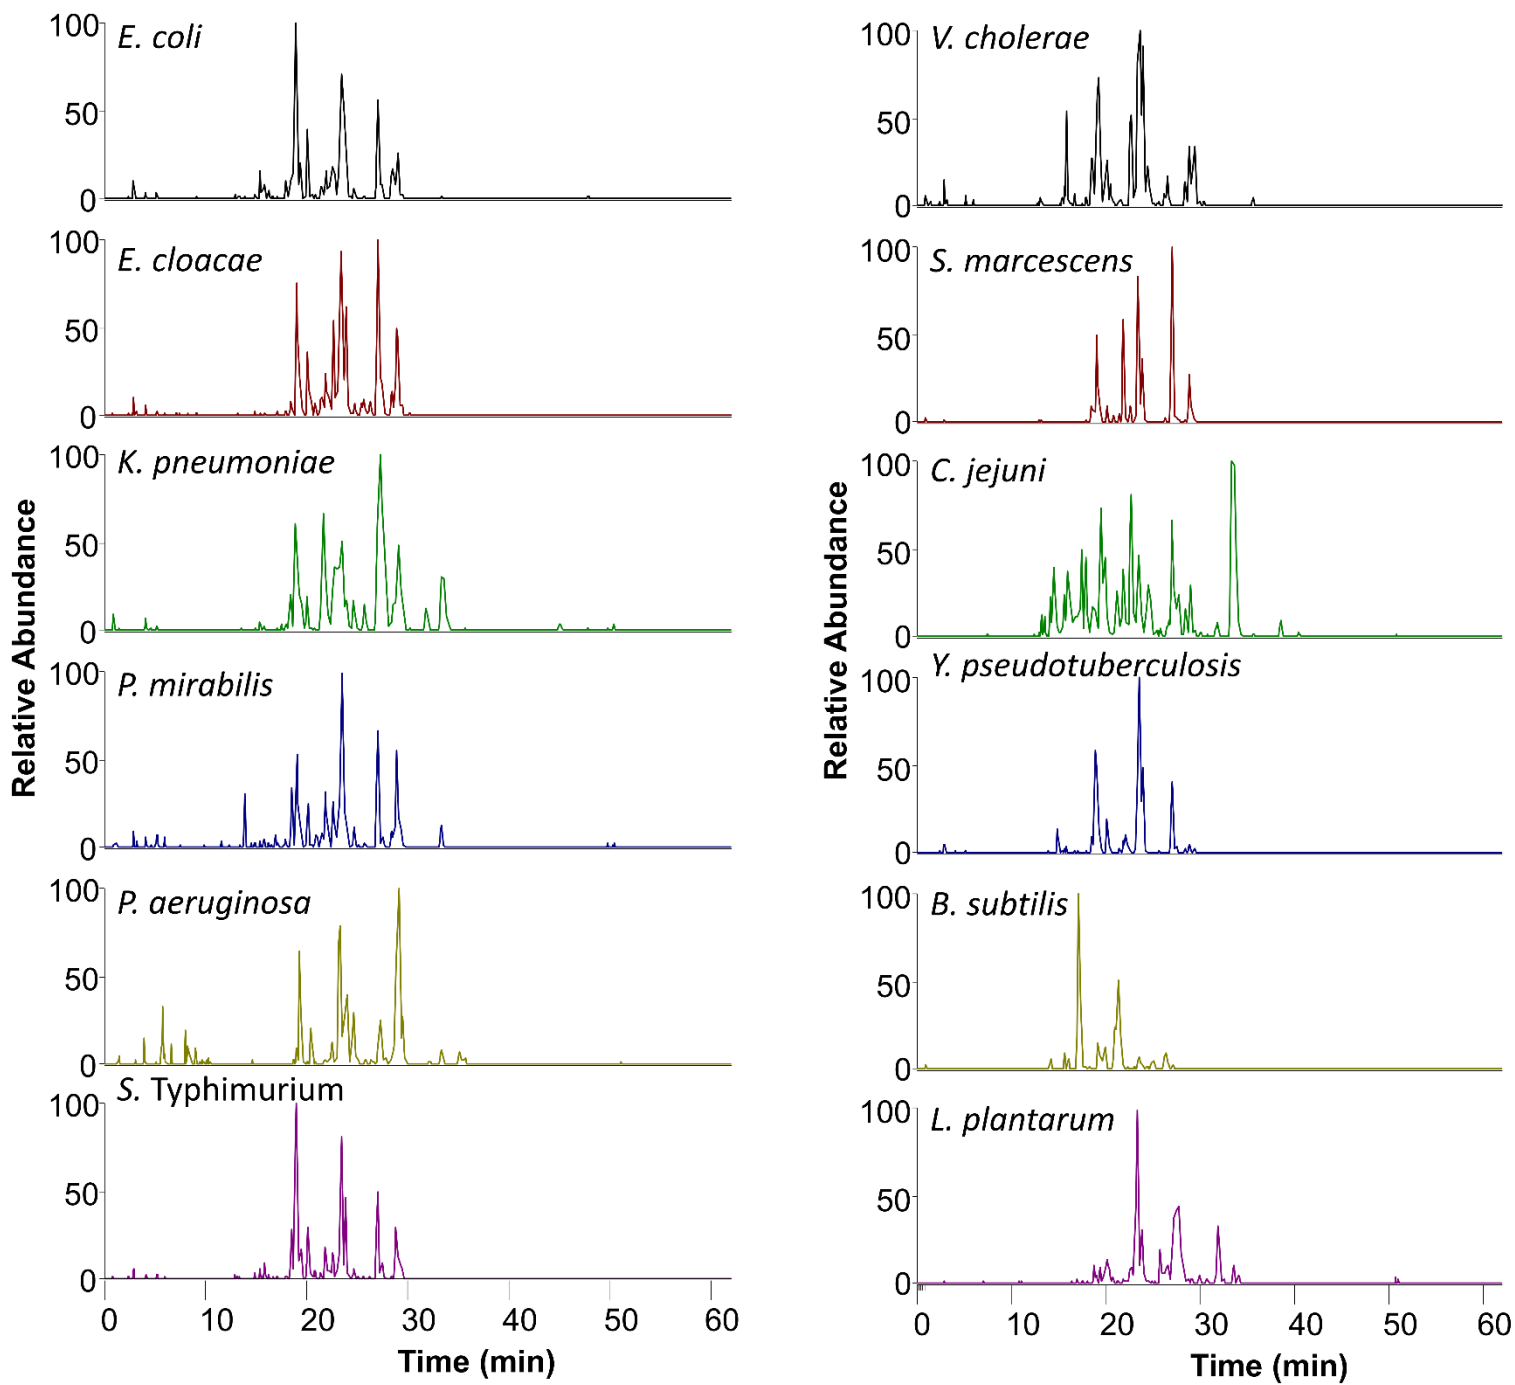

**Figure S1.** Base peak LC-MS traces of all 12 investigated bacterial lipid extracts.

PG 16:0/16:1(9Z)

PG 16:0/16:1(*cis*  $\omega$ -7)

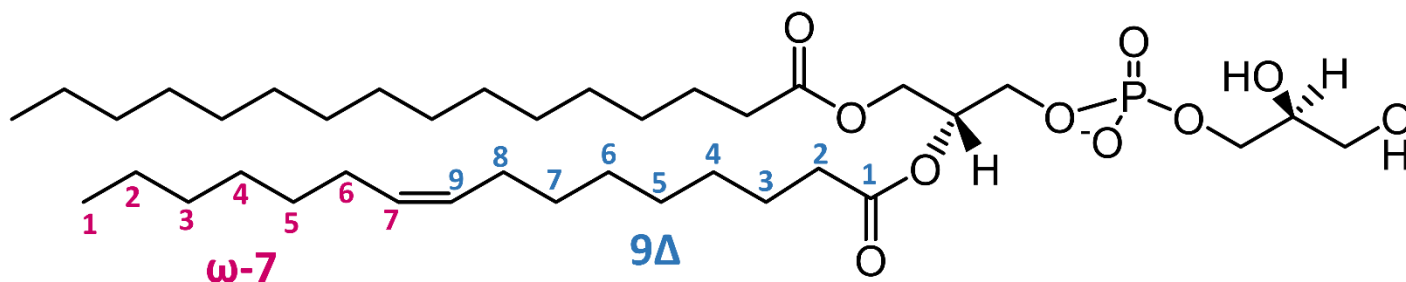

PG 16:0/18:1(11Z)

PG 16:0/18:1(*cis*  $\omega$ -7)

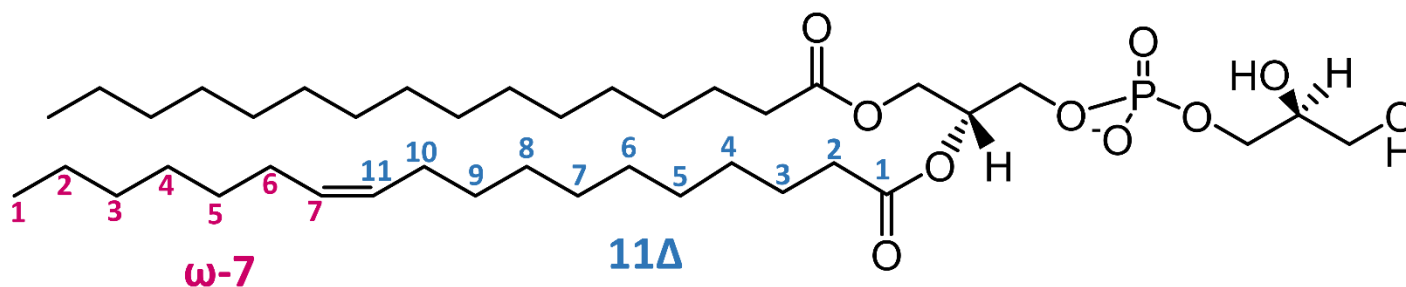

**Figure S2.** The omega nomenclature ( $\omega$ -7) in pink font allows simple recognition of unsaturation elements which are found at the same position from the terminal acyl chain carbon end despite having different numbers of carbon atoms within the acyl chains. The contrasting delta nomenclature is shown in blue font.

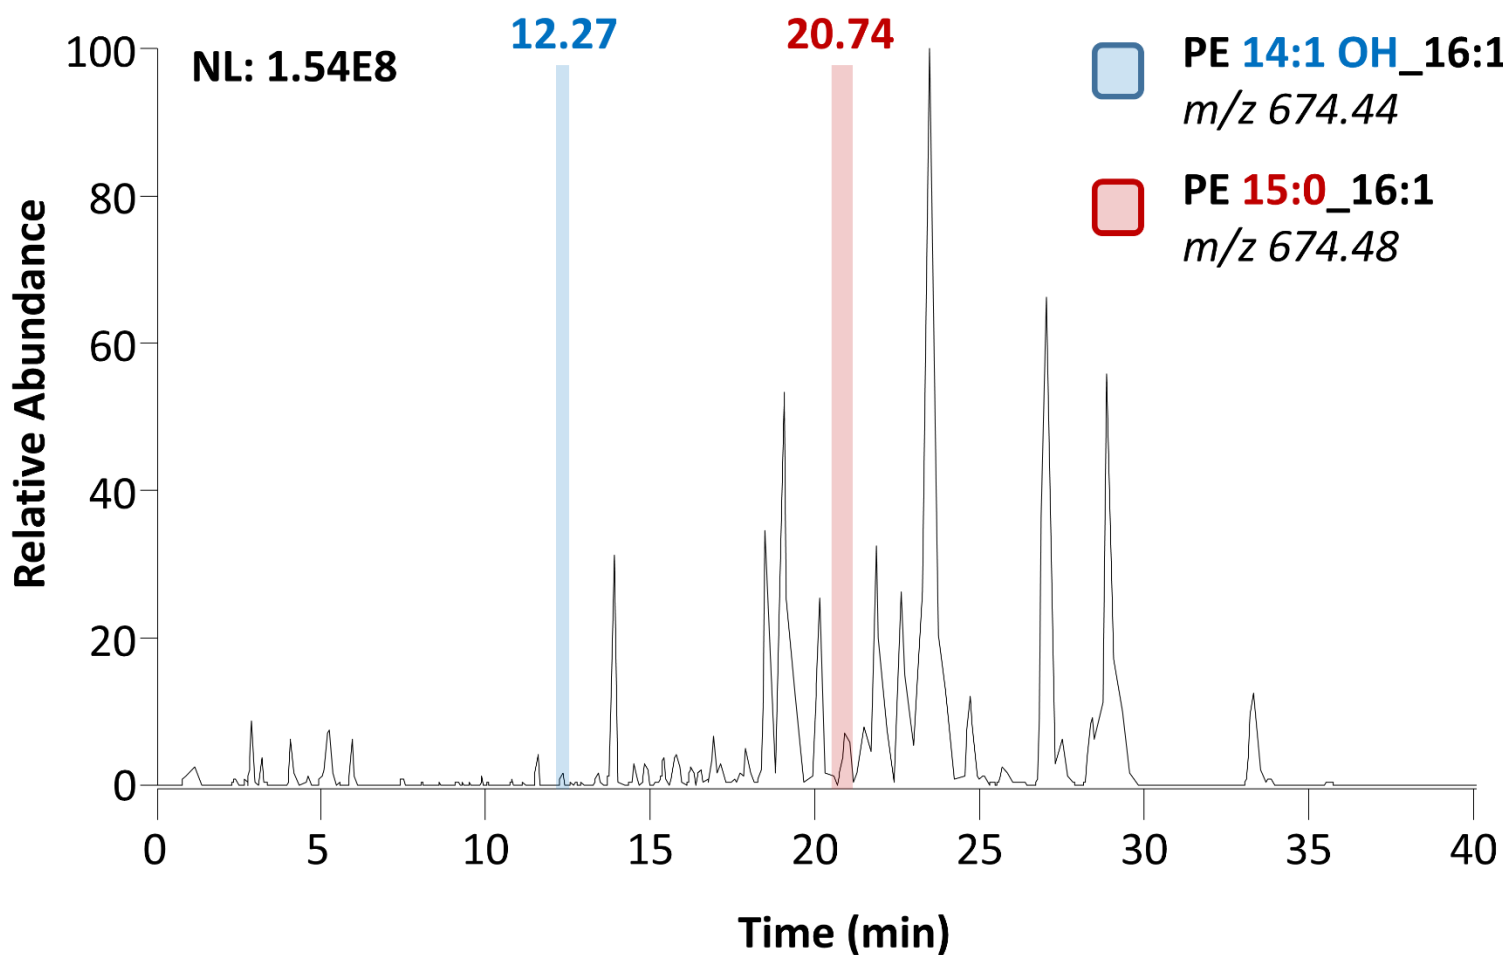

**Figure S3.** Example of marked differences in retention time of two lipids - one containing an unsaturated hydroxyl acyl chain (PE 14:1 OH\_16:1 of  $m/z$  674.44) and its non-hydroxyl lipid counterpart (PE 15:0\_16:1 of  $m/z$  674.48) from *P. mirabilis* lipid extract. With lack of high-resolution instrumentation, differences in retention time enable differentiation (albeit not complete characterization) of hydroxyl lipids and their isobaric non-hydroxyl counterparts with a mass difference of 0.04 Da.

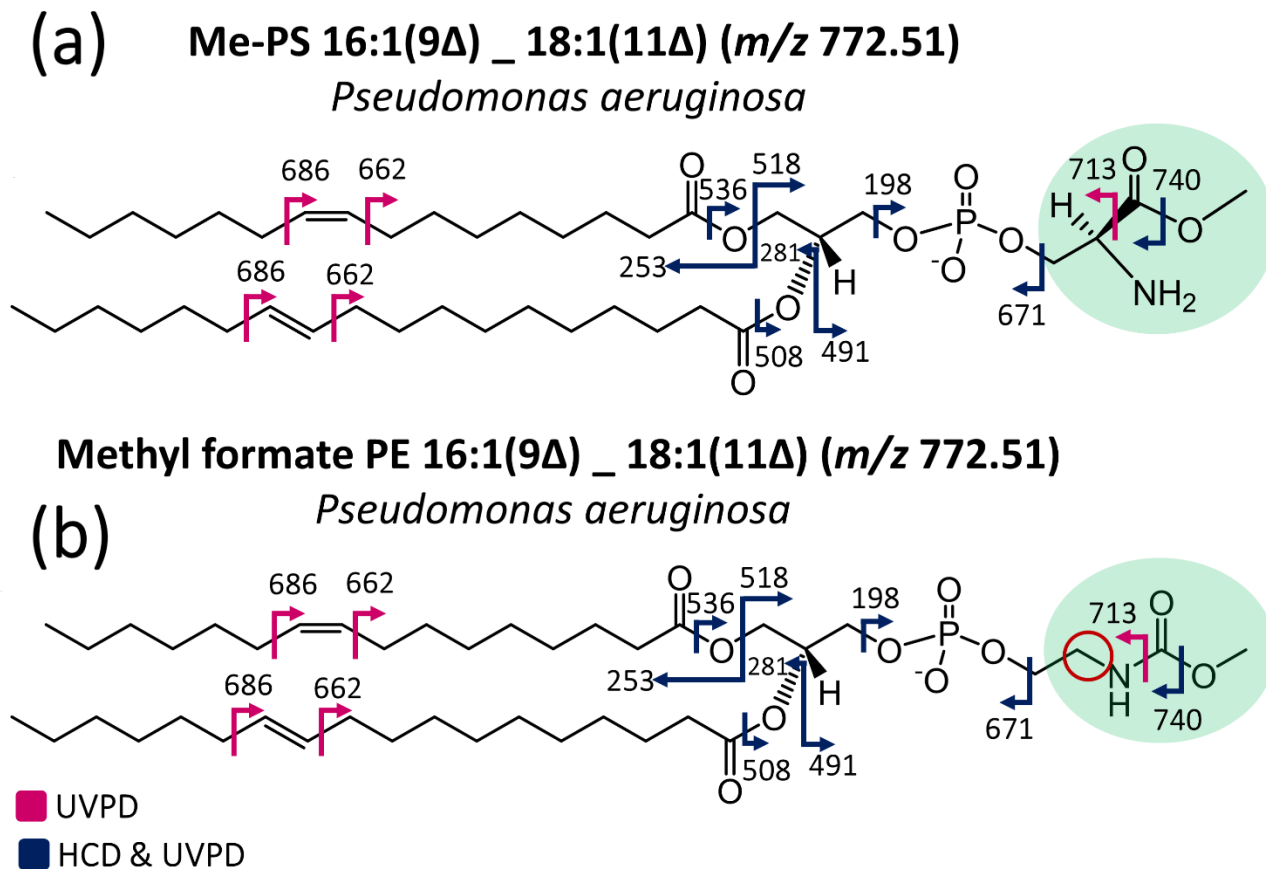

**Figure S4.** Two possible structures for the observed unique headgroup as shown for a lipid of  $m/z$  772.51 from *P. aeruginosa* lipid extract; **(a)** Me-PS type lipid and **(b)** modified PE headgroup with methyl formate. Both structural possibilities align with the measured intact mass and fragmentation patterns. Hypothetical cleavage of the C-N bond circled in red in **(b)** (theoretical  $m/z$  698) could unambiguously identify the correct structure for this headgroup, but is not observed, making **(a)** the more likely structure.

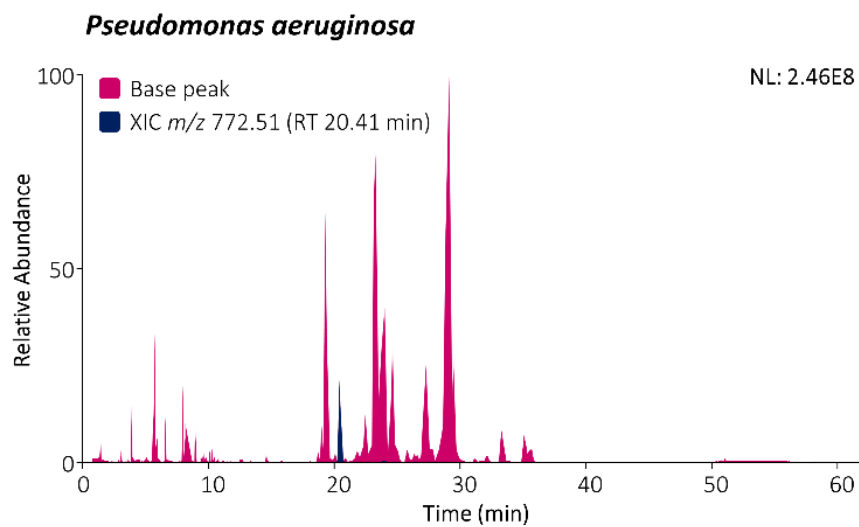

**Figure S5.** Base peak LC-MS trace of *Pseudomonas aeruginosa* lipid extract with XIC of  $m/z$  772.51 identified as Me-PS 16:1(9 $\Delta$ ) \_ 18:1(11 $\Delta$ ) highlighted.

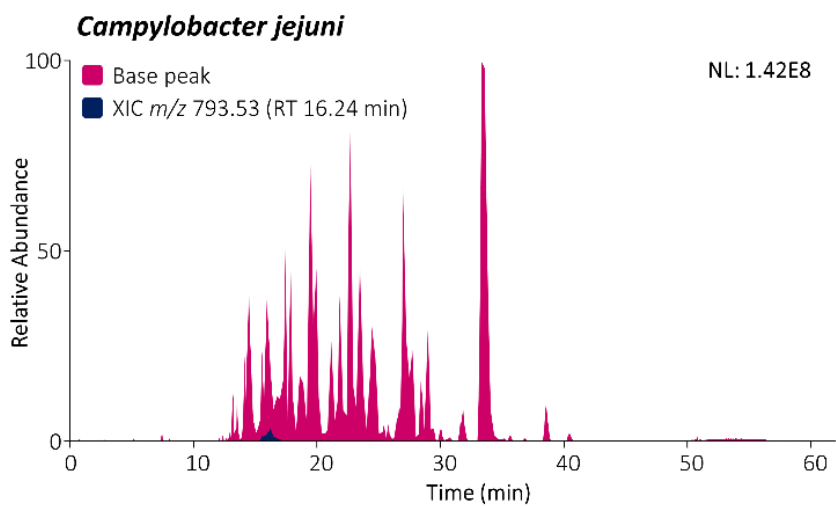

**Figure S6.** Base peak LC-MS trace of *Campylobacter jejuni* lipid extract with XIC of  $m/z$  793.53 identified as Lysyl-PG 13:0\_15:0 highlighted.

|         | Species                                        | Strain |
|---------|------------------------------------------------|--------|
| Gram(-) | <i>Escherichia coli</i>                        | W3110  |
|         | <i>Enterobacter cloacae</i>                    | R/S-WT |
|         | <i>Klebsiella pneumoniae</i>                   | MKP103 |
|         | <i>Proteus mirabilis</i>                       | NR0250 |
|         | <i>Pseudomonas aeruginosa</i>                  | PA14   |
|         | <i>Salmonella enterica</i> serovar Typhimurium | LT2    |
|         | <i>Vibrio cholerae</i>                         | C6706  |
|         | <i>Serratia marcescens</i>                     | NR0342 |
|         | <i>Campylobacter jejuni</i>                    | 81176  |
|         | <i>Yersinia pseudotuberculosis</i>             | pB1+   |
| Gram(+) | <i>Bacillus subtilis</i>                       | 168    |
|         | <i>Lactobacillus plantarum</i>                 | WCFS1  |

**Table S1.** List of investigated bacterial lipid extracts including 10 Gram-negative and 2 Gram-positive species.



## *E. coli*

| Precursor m/z | Precursor m/z (theo) | ppm error | RT (min) | Headgroup | acyl chain 1 | m/z      | m/z (theo) | ppm error | acyl chain 2 | m/z      | m/z (theo) | ppm error | Unsat Ion 1 m/z | Unsat Ion 1 m/z (theo) | Unsat Ion 1 ppm error | Unsat Ion 2 m/z | Unsat Ion 2 m/z (theo) | Unsat Ion 2 ppm error | Difference (Da) | Unsat Position (Delta) | Unsat Position (Omega) |
|---------------|----------------------|-----------|----------|-----------|--------------|----------|------------|-----------|--------------|----------|------------|-----------|-----------------|------------------------|-----------------------|-----------------|------------------------|-----------------------|-----------------|------------------------|------------------------|
| 691.4562      | 691.4556             | 0.9       | 15.48    | PG        | 14:0         | 227.2018 | 227.2017   | 0.4       | 16:1         | 253.2175 | 253.2173   | 0.8       | 581.3485        | 581.346                | 4.3                   | 605.3403        | 605.346                | -9.4                  | 23.99           | 9Δ                     | ω-7                    |
| 646.4453      | 646.4453             | 0.0       | 17.02    | PE        | 12:0         | 199.1703 | 199.1704   | -0.5      | 17:1         | 267.2329 | 267.2330   | -0.4      | 534.3184        | 534.3201               | -3.2                  | 548.3322        | 548.3358               | -6.6                  | 14.01           | 9Δ                     | ω-7                    |
| 705.4713      | 705.4712             | 0.1       | 17.56    | PG        | 14:0         | 227.2017 | 227.2017   | 0.0       | 17:1         | 267.2330 | 267.2330   | 0.0       | 593.3423        | 593.346                | -6.2                  | 607.3586        | 607.3617               | -5.1                  | 14.02           | 9Δ                     | ω-7                    |
| 674.4738      | 674.4766             | -4.2      | 20.86    | PE        | 15:0         | 241.2176 | 241.2173   | 1.2       | 16:1         | 253.2176 | 253.2173   | 1.2       | 564.3688        | 564.3671               | 3.0                   | 588.3705        | 588.3671               | 5.8                   | 24.00           | 9Δ                     | ω-7                    |
| 674.4781      |                      | 2.2       | 21.33    |           | 14:0         | 227.202  | 227.2017   | 1.3       | 17:1         | 267.2334 | 267.2330   | 1.5       | 562.3510        | 562.3514               | -0.7                  | 576.3656        | 576.3671               | -2.6                  | 14.01           |                        |                        |
| 733.504       | 733.5025             | 2.0       | 21.63    | PG        | 16:0         | 255.2329 | 255.2330   | -0.4      | 17:1         | 267.2328 | 267.2330   | -0.7      | 621.3748        | 621.3773               | 4.0                   | 635.3902        | 635.393                | 4.4                   | 14.02           | 9Δ                     | ω-7                    |
| 688.4968      | 688.4923             | 6.5       | 23.29    | PE        | 16:1         | 253.219  | 253.2173   | 6.7       | 16:0         | 255.2333 | 255.2330   | 1.2       | 578.3784        | 578.3827               | -7.4                  | 602.382         | 602.3827               | -1.2                  | 24.00           | 9Δ                     | ω-7                    |
| 688.4935      |                      | 1.7       | 24.15    | PE        | 15:0         | 241.2176 | 241.2173   | 1.2       | 17:1         | 267.2332 | 267.2330   | 0.7       | 576.3669        | 576.3671               | -0.3                  | 590.3782        | 590.3827               | -7.6                  | 14.01           | 9Δ                     | ω-7                    |
| 773.5356      | 773.5338             | 2.3       | 24.00    | PG        | 18:1         | 281.2488 | 281.2486   | 0.7       | 18:1         | 281.2488 | 281.2486   | 0.7       | 663.4229        | 663.4243               | -2.1                  | 687.4188        | 687.4243               | -8.0                  | 24.00           | 11Δ                    | ω-7                    |
| 714.5084      | 714.5079             | 0.7       | 24.59    | PE        | 17:1         | 267.2329 | 267.2330   | -0.4      | 17:1         | 267.2329 | 267.2330   | -0.4      | 602.3824        | 602.3827               | -0.5                  | 616.3964        | 616.3984               | -3.2                  | 14.01           | 9Δ                     | ω-7                    |
| 702.5106      | 702.5079             | 3.8       | 26.82    | PE        | 16:0         | 255.2335 | 255.2330   | 2.0       | 17:1         | 267.2336 | 267.2330   | 2.2       | 590.3806        | 590.3827               | -3.6                  | 604.3992        | 604.3984               | 1.3                   | 14.02           | 9Δ                     | ω-7                    |
| 716.5267      | 716.5236             | 4.3       | 29.02    | PE        | 16:0         | 255.2337 | 255.2330   | 2.7       | 18:1         | 281.2495 | 281.2486   | 3.2       | 606.418         | 606.414                | 6.6                   | 630.4118        | 630.414                | -3.5                  | 23.99           | 11Δ                    | ω-7                    |
| 742.5407      | 742.5392             | 2.0       | 29.47    | PE        | 18:1         | 281.2491 | 281.2486   | 1.8       | 18:1         | 281.2491 | 281.2486   | 1.8       | 632.4254        | 632.4297               | 6.8                   | 656.429         | 656.4297               | -1.1                  | 24.00           | 11Δ                    | ω-7                    |
| 730.5395      | 730.5392             | 0.4       | 33.15    | PE        | 16:0         | 255.233  | 255.2330   | 0.0       | 19:1         | 295.2643 | 295.2639   | 1.4       | 618.4097        |                        | -7.0                  | 632.4281        |                        | -2.5                  | 14.02           | 11Δ                    | ω-7                    |
| 730.5394      |                      | 0.3       | 33.62    |           | 17:1         | 267.2329 | 267.233    | -0.4      | 18:0         | 283.2643 | 283.2643   | 0.0       | 618.4081        | 618.414                | -9.5                  | 632.426         | 632.4297               | -5.9                  | 14.02           | 9Δ                     | ω-7                    |

**Table S2.** List of all identified unsaturated lipids in *E. coli* lipid extract with all precursor and fragment ion ppm error values for acyl chain product ions and unsaturation element fragment ions (within 10 ppm error). Features are color coded by headgroup (PGs in red, PEs in yellow, PCs in purple), unsaturation type (cyclopropane rings in blue, double bonds in green), and unique acyl chain modifications (odd-carbon branched acyl chains in pink, hydroxyl acyl chains in brown).

## *E. cloacae*

| Precursor m/z | Precursor m/z (theo) | ppm error | RT (min) | Headgroup | acyl chain 1 | m/z (theo) | ppm error | acyl chain 2 | m/z  | m/z (theo) | ppm error | Unsat Ion 1 m/z | Unsat Ion 1 m/z (theo) | Unsat Ion 1 ppm error | Unsat Ion 2 m/z | Unsat Ion 2 m/z (theo) | Unsat Ion 2 ppm error | Difference (Da) | Unsat Position (Delta) | Unsat Position (Omega) |          |
|---------------|----------------------|-----------|----------|-----------|--------------|------------|-----------|--------------|------|------------|-----------|-----------------|------------------------|-----------------------|-----------------|------------------------|-----------------------|-----------------|------------------------|------------------------|----------|
| 632.4302      | 632.4297             | 0.8       | 14.79    | PE        | 12:0         | 199.1704   | 199.1704  | 0.0          | 16:1 | 253.2174   | 253.2173  | 0.4             | 522.3250               | 522.3201              | 9.4             | 546.3161               | 546.3201              | -7.3            | 23.99                  | 9Δ                     | ω-7      |
| 691.4559      | 691.4556             | 0.4       | 15.33    | PG        | 14:0         | 227.2018   | 227.2017  | 0.4          | 16:1 | 253.2174   | 253.2173  | 0.4             | 581.3483               | 581.346               | 4.0             | 605.3417               | 605.346               | -7.1            | 23.99                  | 9Δ                     | ω-7      |
| 646.4458      | 646.4453             | 0.8       | 17.11    | PE        | 12:0         | 199.1705   | 199.1704  | 0.5          | 17:1 | 267.2331   | 267.2330  | 0.4             | 534.319                | 534.3201              | -2.1            | 548.3337               | 548.3358              | -3.8            | 14.01                  | 9Δ                     | ω-7      |
| 705.4714      | 705.4712             | 0.3       | 17.57    | PG        | 14:0         | 227.2017   | 227.2017  | 0.0          | 17:1 | 267.2330   | 267.2330  | 0.0             | 593.3426               | 593.346               | -5.7            | 607.3588               | 607.3617              | -4.8            | 14.02                  | 9Δ                     | ω-7      |
| 719.4877      | 719.4869             | 1.1       | 19.09    | PG        | 16:0         | 255.2329   | 255.2330  | -0.4         | 16:1 | 253.2176   | 253.2173  | 1.2             | 609.3812               | 609.3773              | 6.4             | 633.3773               | 633.3773              | 0.0             | 24.00                  | 9Δ                     | ω-7      |
| 686.4773      | 686.4766             | 1.0       | 19.25    | PE        | 16:1         | 253.2174   | 253.2173  | 0.4          | 16:1 | 253.2174   | 253.2173  | 0.4             | 576.3707               | 576.3671              | 6.2             | 600.3616               | 600.3671              | -9.2            | 23.99                  | 9Δ                     | ω-7      |
| 674.4785      | 674.4766             | 2.8       | 20.82    | PE        | 15:0         | 241.2177   | 241.2173  | 1.7          | 16:1 | 253.2178   | 253.2173  | 2.0             | 564.3664               | 564.3671              | -1.2            | 588.3699               | 588.3671              | 4.8             | 24.00                  | 9Δ                     | ω-7      |
| 674.4791      | 674.4766             | 3.7       | 21.37    | PE        | 14:0         | 227.2022   | 227.2017  | 2.2          | 17:1 | 267.2336   | 267.2330  | 2.2             | 562.3516               | 562.3514              | 0.4             | 576.366                | 576.3671              | -1.9            | 14.01                  | 9Δ                     | ω-7      |
| 733.5064      | 733.5025             | 5.3       | 21.88    | PG        | 16:0         | 255.2338   | 255.2330  | 3.1          | 17:1 | 267.2339   | 267.2330  | 3.4             | 621.3762               | 621.3773              | -1.8            | 635.3918               | 635.393               | -1.9            | 14.02                  | 9Δ                     | ω-7      |
| 688.4983      | 688.4923             | 8.7       | 23.39    | PE        | 16:1         | 253.2195   | 253.2173  | 8.7          | 16:0 | 255.2334   | 255.2330  | 1.6             | 578.379                | 578.3827              | -6.4            | 602.3827               | 602.3827              | 0.0             | 24.00                  | 9Δ                     | ω-7      |
| 688.4945      | 688.4923             | 3.2       | 24.21    | PE        | 15:0         | 241.2178   | 241.2173  | 2.1          | 17:1 | 267.2336   | 267.2330  | 2.2             | 576.3666               | 576.3671              | -0.9            | 590.3792               | 590.3827              | -5.9            | 14.01                  | 9Δ                     | ω-7      |
| 714.5082      | 714.5079             | 0.4       | 24.66    | PE        | 16:1         | 253.2174   | 253.2173  | 0.4          | 18:1 | 281.2502   | 281.2486  | 5.7             | 604.3972               | 604.3984              | -2.0            | 628.3955               | 628.3984              | -4.6            | 24.00                  | 9Δ(16:1), 11Δ(18:1)    | ω-7, ω-7 |
| 702.5103      | 702.5079             | 3.4       | 26.28    | PE        | 17:1         | 267.2331   | 267.2330  | 0.4          | 17:1 | 267.2331   | 267.2330  | 0.4             | 602.3776               | 602.3827              | -8.5            | 616.3969               | 616.3984              | -2.4            | 14.02                  | 9Δ, 9Δ                 | ω-7, ω-7 |
| 702.5103      | 702.5079             | 3.4       | 26.28    | PE        | 16:1         | 253.2178   | 253.2173  | 2.0          | 17:0 | 269.2492   | 269.2486  | 2.2             | 592.3999               | 592.3984              | 2.5             | 616.3953               | 616.3984              | -5.0            | 24.00                  | 9Δ                     | ω-7      |
| 702.5106      | 702.5079             | 3.8       | 26.81    | PE        | 16:0         | 255.2335   | 255.2330  | 2.0          | 17:1 | 267.2336   | 267.2330  | 2.2             | 590.3806               | 590.3827              | -3.6            | 604.3992               | 604.3984              | 1.3             | 14.02                  | 9Δ                     | ω-7      |
| 728.5271      | 728.5236             | 4.8       | 27.49    | PE        | 17:1         | 267.2337   | 267.2330  | 2.6          | 18:1 | 281.2495   | 281.2486  | 3.2             | 618.4108               | 618.414               | -5.2            | 642.4083               | 642.414               | -8.9            | 24.00                  | 9Δ(17:1), 11Δ(18:1)    | ω-7      |
| 716.5265      | 716.5236             | 4.0       | 28.86    | PE        | 16:0         | 255.2337   | 255.2330  | 2.7          | 18:1 | 281.2494   | 281.2486  | 2.8             | 606.4182               | 606.414               | 6.9             | 630.412                | 630.414               | -3.2            | 23.99                  | 11Δ                    | ω-7      |
| 716.5243      | 716.5236             | 1.0       | 30.14    | PE        | 17:1         | 267.2332   | 267.2330  | 0.7          | 17:0 | 269.2486   | 269.2486  | 0.0             | 604.3951               | 604.3984              | -5.5            | 618.412                | 618.414               | -3.2            | 14.02                  | 9Δ                     | ω-7      |
| 730.5387      | 730.5392             | 0.7       | 33.48    | PE        | 16:0         | 255.233    | 255.2330  | 0.0          | 19:1 | 295.2643   | 295.2639  | 1.4             | 618.41                 | 618.414               | -6.5            | 632.4272               | 632.4297              | -4.0            | 14.02                  | 9Δ(17:1), 11Δ(19:1)    | ω-7, ω-7 |
| 730.5387      | 730.5392             | 0.7       | 33.48    | PE        | 17:1         | 267.2330   | 267.2330  | 0.0          | 18:0 | 283.2644   | 283.2643  | 0.4             | 618.41                 | 618.414               | -6.5            | 632.4272               | 632.4297              | -4.0            | 14.02                  | 9Δ(17:1), 11Δ(19:1)    | ω-7, ω-7 |

**Table S3.** List of all identified unsaturated lipids in *E. cloacae* lipid extract with all precursor and fragment ion ppm error values for acyl chain product ions and unsaturation element fragment ions (within 10 ppm error). Features are color coded by headgroup (PGs in red, PEs in yellow, PCs in purple), unsaturation type (cyclopropane rings in blue, double bonds in green), and unique acyl chain modifications (odd-carbon branched acyl chains in pink, hydroxyl acyl chains in brown).

## K. pneumoniae

| Precursor m/z | Precursor m/z (theo) | ppm error | RT (min) | Headgroup | acyl chain 1 | m/z      | m/z (theo) | ppm error | acyl chain 2 | m/z      | m/z (theo) | ppm error | Unsat Ion 1 m/z | Unsat Ion 1 m/z (theo) | Unsat Ion 1 ppm error | Unsat Ion 2 m/z | Unsat Ion 2 m/z (theo) | Unsat Ion 2 ppm error | Difference (Da) | Unsat Position (Delta) | Unsat Position (Omega) |
|---------------|----------------------|-----------|----------|-----------|--------------|----------|------------|-----------|--------------|----------|------------|-----------|-----------------|------------------------|-----------------------|-----------------|------------------------|-----------------------|-----------------|------------------------|------------------------|
| 717.4713      | 717.4712             | 0.1       | 15.72    | PG        | 16:1         | 253.2173 | 253.2173   | 0.0       | 16:1         | 253.2173 | 253.2173   | 0.0       | 607.3639        | 607.3617               | 3.6                   | 631.3564        | 631.3617               | -8.4                  | 23.99           | 9A                     | ω-7                    |
| 646.4460      | 646.4453             | 1.1       | 17.06    | PE        | 12:0         | 199.1705 | 199.1704   | 0.5       | 17:1         | 267.2332 | 267.2330   | 0.7       | 534.3186        | 534.3201               | -2.8                  | 548.3332        | 548.3358               | 4.7                   | 14.01           | 9A                     | ω-7                    |
| 705.4719      | 705.4712             | 1.0       | 17.45    | PG        | 14:0         | 227.2018 | 227.2017   | 0.4       | 17:1         | 267.2332 | 267.2330   | 0.7       | 593.3433        | 593.346                | -4.6                  | 607.3599        | 607.3617               | -3.0                  | 14.02           | 9A                     | ω-7                    |
| 705.4713      |                      | 0.1       | 17.75    |           | 15:1         | 239.2016 | 239.2017   | -0.4      | 16:0         | 255.2330 | 255.2330   | 0.0       | 593.3425        | 593.346                | -5.9                  | 607.3587        | 607.3617               | -4.9                  | 14.02           | 7A                     | ω-7                    |
| 719.4877      | 719.4869             | 1.1       | 19.03    | PG        | 16:0         | 255.2329 | 255.2330   | -0.4      | 16:1         | 253.2176 | 253.2173   | 1.2       | 609.3813        | 609.3773               | 6.6                   | 633.3832        | 633.3773               | 9.3                   | 24.00           | 9A                     | ω-7                    |
| 719.4874      |                      | 0.7       | 19.52    |           | 15:0         | 241.2174 | 241.2173   | 0.4       | 17:1         | 267.2331 | 267.2330   | 0.4       | 607.3596        | 607.3617               | -3.5                  | 621.3796        | 621.3773               | 3.7                   | 14.02           | 9A                     | ω-7                    |
| 745.5029      | 745.5025             | 0.5       | 20.91    | PG        | 17:1         | 267.2329 | 267.2330   | -0.4      | 17:1         | 267.2329 | 267.2330   | -0.4      | 633.3743        | 633.3773               | -4.7                  | 647.3898        | 647.393                | -4.9                  | 14.02           | 9A, 9B                 | ω-7, ω-7               |
| 674.4789      | 674.4766             | 3.4       | 21.36    | PE        | 14:0         | 227.2022 | 227.2017   | 2.2       | 17:1         | 267.2336 | 267.2330   | 2.2       | 562.3518        | 562.3514               | 0.7                   | 576.3665        | 576.3671               | -1.0                  | 14.01           | 9A                     | ω-7                    |
| 733.5034      | 733.5025             | 1.2       | 21.87    | PG        | 16:0         | 255.2332 | 255.2330   | 0.8       | 17:1         | 267.2332 | 267.2330   | 0.7       | 621.3751        | 621.3773               | -3.5                  | 635.3906        | 635.393                | -3.8                  | 14.02           | 9A                     | ω-7                    |
| 688.4933      | 688.4923             | 1.5       | 24.25    | PE        | 15:0         | 241.2175 | 241.2173   | 0.8       | 17:1         | 267.2332 | 267.2330   | 0.7       | 576.3668        | 576.3671               | -0.5                  | 590.3782        | 590.3827               | -7.6                  | 14.01           | 9A                     | ω-7                    |
| 747.5187      | 747.5182             | 0.7       | 23.75    | PG        | 16:1         | 253.2174 | 253.2173   | 0.4       | 18:0         | 283.2644 | 283.2643   | 0.4       | 637.4102        | 637.4086               | 2.5                   | 661.4063        | 661.4086               | -3.5                  | 24.00           | 9A                     | ω-7                    |
|               |                      |           |          |           | 16:0         | 255.2330 | 255.2330   | 0.0       | 18:1         | 281.2487 | 281.2486   | 0.4       |                 |                        |                       |                 |                        |                       |                 |                        | 11A                    |
| 714.5103      | 714.5079             | 3.4       | 24.06    | PE        | 16:1         | 253.2178 | 253.2173   | 2.0       | 18:1         | 281.2493 | 281.2486   | 2.5       | 604.3991        | 604.3984               | 1.2                   | 628.4047        | 628.3984               | 10.0                  | 24.01           | 9A(16:1), 11A(18:1)    | ω-7, ω-7               |
| 714.5083      |                      | 0.6       | 24.54    |           | 17:1         | 267.2329 | 267.2330   | -0.4      | 17:1         | 267.2329 | 267.2330   | -0.4      | 602.3795        | 602.3827               | -5.3                  | 616.397         | 616.3984               | -2.3                  | 14.02           | 9A, 9B                 | ω-7, ω-7               |
| 702.5085      | 702.5079             | 0.9       | 26.70    | PE        | 16:0         | 255.2330 | 255.2330   | 0.0       | 17:1         | 267.2331 | 267.2330   | 0.4       | 590.3792        | 590.3827               | -5.9                  | 604.3984        | 604.3984               | 0.0                   | 14.02           | 9A                     | ω-7                    |
| 761.5354      | 761.5338             | 2.1       | 27.45    | PG        | 16:0         | 255.2334 | 255.2330   | 1.6       | 19:1         | 295.2647 | 295.2639   | 2.7       | 649.4069        | 649.4086               | -2.6                  | 663.4225        | 663.4243               | -2.7                  | 14.02           | 11A                    | ω-7                    |
|               |                      |           |          |           |              |          |            |           |              |          |            |           |                 | 618.4108               | 618.414               | -5.2            | 642.4086               | 642.414               | 8.4             | 24.00                  | 9A(17:1), 11A(18:1)    |
| 728.5267      | 728.5236             | 4.3       | 27.92    | PE        | 17:1         | 267.2337 | 267.2330   | 2.6       | 18:1         | 281.2495 | 281.2486   | 3.2       | 616.3976        | 616.3984               | -1.3                  | 630.4116        | 630.414                | -3.8                  | 14.01           |                        |                        |
| 716.5273      |                      | 5.2       | 29.07    |           | 16:0         | 255.2339 | 255.2330   | 3.5       | 18:1         | 281.2496 | 281.2486   | 3.6       | 606.4194        | 606.414                | 8.9                   | 630.4113        | 630.414                | -4.3                  | 23.99           | 11A                    | ω-7                    |
| 716.5239      | 716.5236             | 0.4       | 29.57    | PE        | 16:1         | 253.2174 | 253.2173   | 0.4       | 18:0         | 283.2643 | 283.2643   | 0.0       | 606.4146        | 606.414                | 1.0                   | 630.4111        | 630.414                | -4.6                  | 24.00           | 9A                     | ω-7                    |
| 716.5239      |                      | 0.4       | 29.89    |           | 15:0         | 241.2174 | 241.2173   | 0.4       | 19:1         | 295.2643 | 295.2639   | 1.4       | 604.3932        | 604.3984               | -8.6                  | 618.413         | 618.414                | -1.6                  | 14.02           | 11A                    | ω-7                    |
| 742.5415      | 742.5392             | 3.1       | 31.53    | PE        | 17:1         | 267.233  | 267.2330   | 0.0       | 19:1         | 295.2643 | 295.2639   | 1.4       | 630.4122        | 630.414                | -2.9                  | 644.4269        | 644.4297               | -4.3                  | 14.01           | 9A(17:1), 11A(18:1)    | ω-7, ω-7               |
| 730.5399      | 730.5392             | 1.0       | 33.02    | PE        | 16:0         | 255.2331 | 255.2330   | 0.4       | 19:1         | 295.2644 | 295.2639   | 1.7       | 618.4104        | 618.414                | -5.8                  | 632.429         | 632.4297               | -1.1                  | 14.02           | 11A                    | ω-7                    |
| 730.5396      |                      | 0.5       | 33.84    |           | 17:1         | 267.2330 | 267.2330   | 0.0       | 18:0         | 283.2644 | 283.2643   | 0.4       | 618.4097        | 618.414                | -7.0                  | 632.4281        | 632.4297               | -2.5                  | 14.02           | 9A                     | ω-7                    |
| 756.5578      | 756.5549             | 3.8       | 33.95    | PE        | 18:1         | 281.2494 | 281.2486   | 2.8       | 19:1         | 295.2650 | 295.2639   | 3.7       | 646.445         | 646.4453               | -0.5                  | 670.4503        | 670.4453               | 7.5                   | 24.01           | 11A, 11B               | ω-7, ω-7               |
|               |                      |           |          |           |              |          |            |           |              |          |            |           |                 | 644.4269               | 644.4297              | -4.3            | 658.4447               | 658.4453              | -0.9            | 14.02                  |                        |
| 744.5557      | 744.5549             | 1.1       | 35.58    | PE        | 18:1         | 281.2489 | 281.2486   | 1.1       | 18:0         | 283.2643 | 283.2643   | 0.0       | 634.4459        | 634.4453               | 0.9                   | 658.4434        | 658.4453               | -2.9                  | 24.00           | 11A                    | ω-7                    |
| 770.5709      | 770.5705             | 0.5       | 38.40    | PE        | 19:1         | 295.2643 | 295.2639   | 1.4       | 19:1         | 295.2643 | 295.2639   | 1.4       | 658.4431        | 658.4453               | -3.3                  | 672.4579        | 672.461                | 4.6                   | 14.01           | 11A, 11B               | ω-7, ω-7               |

**Table S4.** List of all identified unsaturated lipids in *K. pneumoniae* lipid extract with all precursor and fragment ion ppm error values for acyl chain product ions and unsaturation element fragment ions (within 10 ppm error). Features are color coded by headgroup (PGs in red, PEs in yellow, PCs in purple), unsaturation type (cyclopropane rings in blue, double bonds in green), and unique acyl chain modifications (odd-carbon branched acyl chains in pink, hydroxyl acyl chains in brown).

## *P. mirabilis*

| Precursor $m/z$ | Precursor $m/z$ (theo) | ppm error | RT (min) | Headgroup | acyl chain 1 $m/z$ | $m/z$ (theo) | ppm error | acyl chain 2 $m/z$ | $m/z$ (theo) | ppm error | Unsat Ion 1 $m/z$ | Unsat Ion 1 ppm error | Unsat Ion 2 $m/z$ | Unsat Ion 2 ppm error | Difference (Da) | Unsat Position (Delta) | Unsat Position (Omega) |      |       |                        |                          |
|-----------------|------------------------|-----------|----------|-----------|--------------------|--------------|-----------|--------------------|--------------|-----------|-------------------|-----------------------|-------------------|-----------------------|-----------------|------------------------|------------------------|------|-------|------------------------|--------------------------|
| 648.4255        | 648.4246               | 1.4       | 11.51    | PE        | 12:0 OH            | 215.1655     | 215.1653  | 0.9                | 16:1         | 253.2176  | 253.2173          | 1.2                   | 538.3151          | 538.315               | 0.2             | 562.3179               | 562.315                | 5.2  | 24.00 | 9a                     | $\omega$ -7              |
| 674.4408        | 674.4402               | 0.9       | 12.27    | PE        | 14:1 OH            | 241.1811     | 241.1809  | 0.8                | 16:1         | 253.2175  | 253.2173          | 0.8                   | 564.3303          | 564.3307              | -0.7            | 588.3312               | 588.3307               | 0.8  | 24.00 | 9a(16:1), 7a(14:1 OH)  | $\omega$ -7, $\omega$ -7 |
| 662.4404        | 662.4402               | 0.3       | 12.90    | PE        | 12:0 OH            | 215.1653     | 215.1653  | 0.0                | 17:1         | 267.2330  | 267.2330          | 0.0                   | 550.3122          | 550.315               | -5.1            | 564.3274               | 564.3307               | -5.8 | 14.02 | 9a                     | $\omega$ -7              |
| 676.4567        | 676.4559               | 1.2       | 13.73    | PE        | 12:0 OH            | 215.1654     | 215.1653  | 0.5                | 18:1         | 281.2488  | 281.2486          | 0.7                   | 566.3472          | 566.3463              | 1.6             | 590.3513               | 590.3463               | 8.5  | 24.00 | 9a                     | $\omega$ -7              |
| 702.4720        | 702.4715               | 0.7       | 14.76    | PE        | 14:1 OH            | 241.1809     | 241.1809  | 0.0                | 18:1         | 281.2487  | 281.2486          | 0.4                   | 592.36            | 592.362               | -3.4            | 616.362                | 616.3625               | -0.8 | 24.00 | 9a(16:1), 7a(14:1 OH)  | $\omega$ -7, $\omega$ -7 |
| 690.4728        | 690.4715               | 1.9       | 15.80    | PE        | 14:0 OH            | 243.1969     | 243.1966  | 1.2                | 17:1         | 267.2333  | 267.2330          | 1.1                   | 578.3434          | 578.3463              | -5.0            | 592.3608               | 592.362                | -2.0 | 14.02 | 9a                     | $\omega$ -7              |
| 717.4717        | 717.4712               | 0.7       | 15.87    | PG        | 16:1               | 253.2175     | 253.2173  | 0.8                | 16:1         | 253.2175  | 253.2173          | 0.8                   | 607.3635          | 607.3617              | 3.0             | 631.361                | 631.3617               | -1.1 | 24.00 | 9a, 9a                 | $\omega$ -7, $\omega$ -7 |
| 730.5035        | 730.5028               | 1.0       | 17.73    | PE        | 16:1               | 253.2174     | 253.2173  | 0.4                | 18:1 OH      | 297.2437  | 297.2435          | 0.7                   | 644.3871          | 644.3933              | -9.6            | 620.3916               | 620.3933               | -2.7 | 24.00 | 9a(16:1), 11a(18:1 OH) | $\omega$ -7, $\omega$ -7 |
|                 |                        |           |          |           | 16:1 OH            | 269.2124     | 269.2122  | 0.7                | 18:1         | 281.2488  | 281.2486          | 0.7                   | 604.3871          | 604.3933              | -9.6            | 620.3916               | 620.3933               | -2.7 | 24.00 | 9a(16:1 OH), 11a(18:1) | $\omega$ -7, $\omega$ -7 |
| 719.4875        | 719.4869               | 0.8       | 19.13    | PG        | 16:0               | 255.2329     | 255.2330  | -0.4               | 16:1         | 253.2175  | 253.2173          | 0.8                   | 609.3801          | 609.3773              | 4.6             | 633.3797               | 633.3773               | 3.8  | 24.00 | 9a                     | $\omega$ -7              |
| 674.4774        | 674.4766               | 1.2       | 20.74    | PE        | 15:0               | 241.2174     | 241.2173  | 0.4                | 16:1         | 253.2175  | 253.2173          | 0.8                   | 564.3681          | 564.3671              | 1.8             | 588.3682               | 588.3671               | 1.9  | 24.00 | 9a                     | $\omega$ -7              |
| 674.4769        |                        | 0.4       | 21.63    |           | 14:0               | 227.2016     | 227.2017  | -0.4               | 17:1         | 267.2329  | 267.2330          | -0.4                  | 562.3511          | 562.3514              | -0.5            | 576.3646               | 576.3671               | -4.3 | 14.01 | 9a                     | $\omega$ -7              |
| 733.5065        | 733.5025               | 5.5       | 21.85    | PG        | 16:0               | 255.2338     | 255.2330  | 3.1                | 17:1         | 267.2340  | 267.2330          | 3.7                   | 621.3762          | 621.3773              | -1.8            | 635.3917               | 635.393                | -2.0 | 14.02 | 9a                     | $\omega$ -7              |
| 688.491         | 688.4923               | -1.9      | 23.27    | PE        | 16:1               | 253.2185     | 253.2173  | 4.7                | 16:0         | 255.2332  | 255.2330          | 0.8                   | 578.3802          | 578.3827              | -4.3            | 602.3826               | 602.3827               | -0.2 | 24.00 | 9a                     | $\omega$ -7              |
| 688.493         |                        | 1.0       | 24.10    |           | 15:0               | 241.2174     | 241.2173  | 0.4                | 17:1         | 267.2331  | 267.2330          | 0.4                   | 576.3658          | 576.3671              | -2.3            | 590.3787               | 590.3827               | -6.8 | 14.01 | 9a                     | $\omega$ -7              |
| 747.5201        | 747.5182               | 2.5       | 23.54    | PG        | 16:0               | 255.2334     | 255.2330  | 1.6                | 18:1         | 281.2491  | 281.2486          | 1.8                   | 637.4125          | 637.4086              | 6.1             | 661.4036               | 661.4086               | -7.6 | 23.99 | 9a                     | $\omega$ -7              |
| 714.5081        | 714.5079               | 0.3       | 25.55    | PE        | 17:1               | 267.2329     | 267.2330  | -0.4               | 17:1         | 267.2329  | 267.2330          | -0.4                  | 602.3801          | 602.3827              | -4.3            | 616.3959               | 616.3984               | -4.1 | 14.02 | 9a, 9a                 | $\omega$ -7, $\omega$ -7 |
| 702.5082        | 702.5079               | 0.4       | 26.74    | PE        | 16:0               | 255.2330     | 255.2330  | 0.0                | 17:1         | 267.2330  | 267.2330          | 0.0                   | 590.3793          | 590.3827              | -5.8            | 604.3981               | 604.3984               | -0.5 | 14.02 | 9a                     | $\omega$ -7              |
| 728.5245        | 728.5236               | 1.2       | 27.60    | PE        | 16:1               | 253.2175     | 253.2173  | 0.8                | 19:1         | 295.2644  | 295.2639          | 1.7                   | 618.4084          | 618.414               | 9.1             | 642.4077               | 642.414                | -9.8 | 24.00 | 9a(16:1), 11a(19:1)    | $\omega$ -7, $\omega$ -7 |
|                 |                        |           |          |           | 17:1               | 267.2331     | 267.2330  | 0.4                | 18:1         | 281.2488  | 281.2486          | 0.7                   | 616.3965          | 616.3984              | -3.1            | 630.4106               | 630.414                | -5.4 | 14.01 | 9a(17:1), 11a(18:1)    | $\omega$ -7, $\omega$ -7 |
| 716.5234        | 716.5236               | -0.3      | 29.95    | PE        | 15:0               | 241.2173     | 241.2173  | 0.0                | 19:1         | 295.2642  | 295.2639          | 1.0                   | 604.3959          | 604.3984              | -4.1            | 618.4109               | 618.414                | -5.0 | 14.02 | 11a                    | $\omega$ -7              |
|                 |                        |           |          |           | 17:1               | 267.2329     | 267.2330  | -0.4               | 17:0         | 269.2485  | 269.2486          | -0.4                  | 604.3959          | 604.3984              | -4.1            | 618.4109               | 618.414                | -5.0 | 14.02 | 9a                     | $\omega$ -7              |
| 730.5394        | 730.5392               | 0.3       | 33.68    | PE        | 16:0               | 255.2329     | 255.2330  | -0.4               | 19:1         | 295.2642  | 295.2639          | 1.0                   | 618.41            | 618.414               | -6.5            | 632.428                | 632.4297               | -2.7 | 14.02 | 11a                    | $\omega$ -7              |
|                 |                        |           |          |           | 17:1               | 267.2329     | 267.2330  | -0.4               | 18:0         | 283.2643  | 283.2643          | 0.0                   | 618.41            | 618.414               | -6.5            | 632.428                | 632.4297               | -2.7 | 14.02 | 9a                     | $\omega$ -7              |

**Table S5.** List of all identified unsaturated lipids in *P. mirabilis* lipid extract with all precursor and fragment ion ppm error values for acyl chain product ions and unsaturation element fragment ions (within 10 ppm error). Features are color coded by headgroup (PGs in red, PEs in yellow, PCs in purple), unsaturation type (cyclopropane rings in blue, double bonds in green), and unique acyl chain modifications (odd-carbon branched acyl chains in pink, hydroxyl acyl chains in brown).

## *P. aeruginosa*

| Precursor m/z | Precursor m/z (theo) | ppm error | RT (min) | Headgroup | acyl chain 1 | m/z          | m/z (theo)   | ppm error | acyl chain 2 | m/z      | m/z (theo) | ppm error | Unsat Ion 1 m/z | Unsat Ion 1 m/z (theo) | Unsat Ion 1 ppm error | Unsat Ion 2 m/z | Unsat Ion 2 m/z (theo) | Unsat Ion 2 ppm error | Difference (Da) | Unsat Position (Delta) | Unsat Position (Omega) |
|---------------|----------------------|-----------|----------|-----------|--------------|--------------|--------------|-----------|--------------|----------|------------|-----------|-----------------|------------------------|-----------------------|-----------------|------------------------|-----------------------|-----------------|------------------------|------------------------|
| 717.4713      | 717.4712             | 0.1       | 15.89    | PG        | 16:1         | 253.217<br>3 | 253.217<br>3 | 0.0       | 16:1         | 253.2173 | 253.2173   | 0.0       | 607.3667        | 607.3617               | 8.2                   | 631.3561        | 631.3617               | -8.9                  | 23.99           | 9a, 9a                 | ω-7, ω-7               |
| 719.4873      | 719.4869             | 0.6       | 18.61    | PG        | 14:0         | 227.201<br>7 | 227.201<br>7 | 0.0       | 18:1         | 281.2487 | 281.2486   | 0.4       | 609.3801        | 609.3773               | 4.6                   | 633.3816        | 633.3773               | 6.8                   | 24.00           | 11a                    | ω-7                    |
| 719.4877      |                      | 1.1       | 19.14    |           | 16:1         | 253.217<br>6 | 253.217<br>3 | 1.2       | 16:0         | 255.2329 | 255.2330   | -0.4      | 609.3807        | 609.3773               | 5.6                   | 633.3797        | 633.3773               | 3.8                   | 24.00           | 9a                     | ω-7                    |
| 745.5027      | 745.5025             | 0.3       | 19.67    | PG        | 16:1         | 253.217<br>3 | 253.217<br>3 | 0.0       | 18:1         | 281.2486 | 281.2486   | 0.0       | 635.39          | 635.393                | -4.7                  | 659.3934        | 659.393                | 0.6                   | 24.00           | 9a(16:1),<br>11a(18:1) | ω-7, ω-7               |
| 733.5023      | 733.5025             | -0.3      | 22.05    | PG        | 16:0         | 255.232<br>9 | 255.233<br>0 | -0.4      | 17:1         | 267.2328 | 267.2330   | -0.7      | 621.3734        | 621.3773               | -6.3                  | 635.3887        | 635.393                | -6.8                  | 14.02           | 9a                     | ω-7                    |
| 747.5201      | 747.5182             | 2.5       | 23.28    | PG        | 16:0         | 255.233<br>0 | 255.233<br>0 | 0.0       | 18:1         | 281.2487 | 281.2486   | 0.4       | 637.4117        | 637.4086               | 4.9                   | 661.4043        | 661.4086               | -6.5                  | 23.99           | 11a                    | ω-7                    |
| 747.5184      |                      | 0.3       | 23.75    |           | 16:1         | 253.217<br>5 | 253.217<br>3 | 0.8       | 18:0         | 283.2644 | 283.2643   | 0.4       | 637.4125        | 637.4086               | 6.1                   | 661.4031        | 661.4086               | -8.3                  | 23.99           | 9a                     | ω-7                    |
| 773.5363      | 773.5338             | 3.2       | 24.04    | PG        | 18:1         | 281.248<br>7 | 281.248<br>6 | 0.4       | 18:1         | 281.2487 | 281.2486   | 0.4       | 663.4236        | 663.4243               | -1.1                  | 687.4175        | 687.4243               | -9.9                  | 23.99           | 11a, 11a               | ω-7, ω-7               |
| 714.5089      | 714.5079             | 1.4       | 24.77    | PE        | 16:1         | 253.217<br>5 | 253.217<br>3 | 0.8       | 18:1         | 281.2489 | 281.2486   | 1.1       | 604.3975        | 604.3984               | -1.5                  | 628.3958        | 628.3984               | -4.1                  | 24.00           | 9a(16:1),<br>11a(18:1) | ω-7, ω-7               |
| 702.5084      |                      | 0.7       | 25.63    |           | 15:0         | 241.217<br>4 | 241.217<br>3 | 0.4       | 18:1         | 281.2487 | 281.2486   | 0.4       | 592.3995        | 592.3984               | 1.9                   | 616.3941        | 616.3984               | -7.0                  | 23.99           | 11a                    | ω-7                    |
| 702.5087      | 702.5079             | 1.1       | 27.07    | PE        | 16:0         | 255.233<br>1 | 255.233<br>0 | 0.4       | 17:1         | 267.2332 | 267.2330   | 0.7       | 590.3789        | 590.3827               | -6.4                  | 604.3978        | 604.3984               | -1.0                  | 14.02           | 9a                     | ω-7                    |
| 761.5361      | 761.5338             | 3.0       | 27.00    | PG        | 16:0         | 255.233<br>5 | 255.233<br>0 | 2.0       | 19:1         | 295.2649 | 295.2639   | 3.4       | 649.4072        | 649.4086               | -2.2                  | 663.423         | 663.4243               | -2.0                  | 14.02           | 11a                    | ω-7                    |
| 716.5258      | 716.5236             | 3.1       | 29.14    | PE        | 16:0         | 255.233<br>5 | 255.233<br>0 | 2.0       | 18:1         | 281.2493 | 281.2486   | 2.5       | 606.4199        | 606.414                | 9.7                   | 630.4124        | 630.414                | -2.5                  | 23.99           | 11a                    | ω-7                    |
| 742.5399      |                      | 0.9       | 29.71    |           | 18:1         | 281.248<br>7 | 281.248<br>6 | 0.4       | 18:1         | 281.2487 | 281.2486   | 0.4       | 632.4242        | 632.4297               | -8.7                  | 656.4308        | 656.4297               | 1.7                   | 24.01           | 11a, 11a               | ω-7                    |
| 742.5393      | 742.5392             | 0.1       | 31.88    | PE        | 17:1         | 267.232<br>9 | 267.233<br>0 | 0.4       | 19:1         | 295.2642 | 295.2639   | 1.0       | 630.4113        | 630.414                | -4.3                  | 644.4264        | 644.4297               | -5.1                  | 14.02           | 9a(17:1),<br>11a(19:1) | ω-7                    |
| 730.54        |                      | 1.1       | 31.13    |           | 17:0         | 269.248<br>8 | 269.248<br>6 | 0.7       | 18:1         | 281.2488 | 281.2486   | 0.7       | 620.4337        | 620.4297               | 6.4                   | 644.4255        | 644.4297               | -6.5                  | 23.99           | 11a                    | ω-7                    |
| 730.5396      | 730.5392             | 0.5       | 33.09    | PE        | 16:0         | 255.233<br>0 | 255.233<br>0 | 0.0       | 19:1         | 295.2643 | 295.2639   | 1.4       | 618.4099        | 618.414                | -6.6                  | 632.4283        | 632.4297               | -2.2                  | 14.02           | 11a                    | ω-7                    |
| 818.5877      | 818.5917             | -4.9      | 31.59    | PC        | 16:0         | 255.232<br>9 | 255.233<br>0 | -0.4      | 19:1         | 295.2642 | 295.2639   | 1.0       | 706.4655        | 706.4665               | -1.4                  | 720.4819        | 720.4821               | -0.3                  | 14.02           | 11a                    | ω-7                    |

**Table S6.** List of all identified unsaturated lipids in *P. aeruginosa* lipid extract with all precursor and fragment ion ppm error values for acyl chain product ions and unsaturation element fragment ions (within 10 ppm error). Features are color coded by headgroup (PGs in red, PEs in yellow, PCs in purple), unsaturation type (cyclopropane rings in blue, double bonds in green), and unique acyl chain modifications (odd-carbon branched acyl chains in pink, hydroxyl acyl chains in brown).

## S. Typhimurium

| Precursor $m/z$ | Precursor $m/z$ (theo) | ppm error | RT (min) | Headgroup | acyl chain 1 $m/z$ | $m/z$ (theo) | ppm error | acyl chain 2 $m/z$ | $m/z$ (theo) | ppm error | Unsat Ion 1 $m/z$ | Unsat Ion 1 $m/z$ (theo) | Unsat Ion 1 ppm error | Unsat Ion 2 $m/z$ | Unsat Ion 2 $m/z$ (theo) | Unsat Ion 2 ppm error | Difference (Da) | Unsat Position (Delta) | Unsat Position (Omega) |                     |          |
|-----------------|------------------------|-----------|----------|-----------|--------------------|--------------|-----------|--------------------|--------------|-----------|-------------------|--------------------------|-----------------------|-------------------|--------------------------|-----------------------|-----------------|------------------------|------------------------|---------------------|----------|
| 691.4560        | 691.4556               | 0.6       | 15.29    | PG        | 14:0               | 227.2018     | 227.2017  | 0.4                | 16:1         | 253.2175  | 253.2173          | 0.8                      | 581.3498              | 581.346           | 6.5                      | 605.3413              | 605.346         | -7.8                   | 23.99                  | 9Δ                  | ω-7      |
| 660.4634        | 660.4610               | 3.6       | 18.43    | PE        | 14:0               | 227.2022     | 227.2017  | 2.2                | 16:1         | 253.2179  | 253.2173          | 2.4                      | 550.347               | 550.3467          | 0.5                      | 574.3439              | 574.3397        | 7.3                    | 24.00                  | 9Δ                  | ω-7      |
| 745.5027        | 745.5025               | 0.3       | 19.67    | PG        | 16:1               | 253.2173     | 253.2173  | 0.0                | 18:1         | 281.2486  | 281.2486          | 0.0                      | 635.3881              | 635.393           | -7.7                     | 659.3951              | 659.393         | 3.2                    | 24.01                  | 9Δ(16:1), 11Δ(18:1) | ω-7, ω-7 |
| 674.4782        | 674.4766               | 2.4       | 20.77    | PE        | 15:0               | 241.2177     | 241.2173  | 1.7                | 16:1         | 253.2177  | 253.2173          | 1.6                      | 564.3654              | 564.3671          | -3.0                     | 588.3688              | 588.3671        | 2.9                    | 24.00                  | 9Δ                  | ω-7      |
| 674.4780        |                        | 2.1       | 21.37    |           | 14:0               | 227.2022     | 227.2017  | 1.3                | 17:1         | 267.2333  | 267.2330          | 1.1                      | 562.351               | 562.3514          | -0.7                     | 576.3655              | 576.3671        | -2.8                   | 14.01                  | 9Δ                  | ω-7      |
| 733.5051        | 733.5025               | 3.5       | 21.75    | PG        | 16:0               | 255.2335     | 255.2330  | 2.0                | 17:1         | 267.2336  | 267.2330          | 2.2                      | 621.3759              | 621.3773          | -2.3                     | 635.3916              | 635.393         | -2.2                   | 14.02                  | 9Δ                  | ω-7      |
| 688.4973        | 688.4923               | 7.3       | 23.43    | PE        | 16:1               | 253.2193     | 253.2173  | 7.9                | 16:0         | 255.2334  | 255.2330          | 1.6                      | 578.3771              | 578.3827          | -9.7                     | 602.3783              | 602.3827        | -7.3                   | 24.00                  | 9Δ                  | ω-7      |
| 688.4929        |                        | 0.9       | 24.33    |           | 15:0               | 241.2174     | 241.2173  | 0.4                | 17:1         | 267.2330  | 267.2330          | 0.0                      | 576.3659              | 576.3671          | -2.1                     | 590.3784              | 590.3827        | -7.3                   | 14.01                  | 9Δ                  | ω-7      |
| 714.5084        | 714.5079               | 0.7       | 24.01    | PE        | 16:1               | 253.2173     | 253.2173  | 0.0                | 18:1         | 281.2487  | 281.2486          | 0.4                      | 604.3973              | 604.3984          | -1.8                     | 628.399               | 628.3984        | 1.0                    | 24.00                  | 9Δ(16:1), 11Δ(18:1) | ω-7, ω-7 |
| 714.5079        |                        | 0.0       | 24.48    |           | 17:1               | 267.2329     | 267.2330  | -0.4               | 17:1         | 267.2329  | 267.2330          | -0.4                     | 602.3776              | 602.3827          | -8.5                     | 616.3949              | 616.3984        | -5.7                   | 14.02                  | 9Δ, 9Δ              | ω-7, ω-7 |
| 702.5085        | 702.5079               | 0.9       | 26.34    | PE        | 16:1               | 253.2174     | 253.2173  | 0.4                | 17:0         | 269.2487  | 269.2486          | 0.4                      | 592.4023              | 592.3984          | 6.6                      | 616.396               | 616.3984        | -3.9                   | 23.99                  | 9Δ                  | ω-7      |
| 702.5084        |                        | 0.7       | 26.73    |           | 16:0               | 255.2332     | 255.2330  | 0.0                | 17:1         | 267.2330  | 267.2330          | 0.0                      | 590.3793              | 590.3827          | -5.8                     | 604.3984              | 604.3984        | 0.0                    | 14.02                  | 9Δ                  | ω-7      |
| 716.5249        | 716.5236               | 1.8       | 28.66    | PE        | 16:0               | 255.2332     | 255.2330  | 0.8                | 18:1         | 281.249   | 281.2486          | 1.4                      | 606.4188              | 606.414           | 7.9                      | 630.4119              | 630.414         | -3.3                   | 23.99                  | 11Δ                 | ω-7      |
| 730.5397        | 730.5392               | 0.7       | 33.18    | PE        | 16:0               | 255.233      | 255.2330  | 0.0                | 19:1         | 295.2643  | 295.2639          | 1.4                      | 618.4095              | 618.414           | -7.3                     | 632.4282              | 632.4297        | -2.4                   | 14.02                  | 11Δ                 | ω-7      |

**Table S7.** List of all identified unsaturated lipids in *S. Typhimurium* lipid extract with all precursor and fragment ion ppm error values for acyl chain product ions and unsaturation element fragment ions (within 10 ppm error). Features are color coded by headgroup (PGs in red, PEs in yellow, PCs in purple), unsaturation type (cyclopropane rings in blue, double bonds in green), and unique acyl chain modifications (odd-carbon branched acyl chains in pink, hydroxyl acyl chains in brown).

## V. cholerae

| Precursor m/z | Precursor m/z (theo) | ppm error | RT (min) | Headgroup | acyl chain 1 | m/z      | m/z (theo) | ppm error | acyl chain 2 | m/z      | m/z (theo) | ppm error | Unsat Ion 1 m/z | Unsat Ion 1 m/z (theo) | Unsat Ion 1 ppm error | Unsat Ion 2 m/z | Unsat Ion 2 m/z (theo) | Unsat Ion 2 ppm error | Difference (Da) | Unsat Position (Delta) | Unsat Position (Omega) |
|---------------|----------------------|-----------|----------|-----------|--------------|----------|------------|-----------|--------------|----------|------------|-----------|-----------------|------------------------|-----------------------|-----------------|------------------------|-----------------------|-----------------|------------------------|------------------------|
| 702.4725      | 702.4715             | 1.4       | 15.33    | PE        | 16:1         | 253.2174 | 253.2173   | 0.4       | 16:1 OH      | 269.2124 | 269.2122   | 0.7       | 592.3627        | 592.362                | 1.2                   | 616.3635        | 616.362                | 2.4                   | 24.00           | 9a, 9a                 | ω-7, ω-7               |
| 658.4467      | 658.4453             | 2.1       | 15.70    | PE        | 14:1         | 225.1863 | 225.1860   | 1.3       | 16:1         | 253.2177 | 253.2173   | 1.6       | 548.3331        | 548.3358               | -4.9                  | 572.334         | 572.3358               | -3.1                  | 24.00           | 9a(16:1), 7a(14:1)     | ω-7, ω-7               |
| 717.4714      | 717.4712             | 0.3       | 15.99    | PG        | 16:1         | 253.2174 | 253.2173   | 0.4       | 16:1         | 253.2174 | 253.2173   | 0.4       | 607.3594        | 607.3617               | -3.8                  | 631.3571        | 631.3617               | -7.3                  | 24.00           | 9a, 9a                 | ω-7, ω-7               |
| 660.4634      | 660.4610             | 3.6       | 18.40    | PE        | 14:0         | 227.2022 | 227.2017   | 2.2       | 16:1         | 253.2179 | 253.2173   | 2.4       | 550.3478        | 550.3467               | 2.0                   | 574.3442        | 574.3397               | 7.8                   | 24.00           | 9a                     | ω-7                    |
| 660.4621      |                      | 1.7       | 19.17    |           | 14:1         | 225.1863 | 225.1860   | 1.3       | 16:0         | 255.2332 | 255.2330   | 0.8       | 550.3476        | 550.3467               | 1.6                   | 574.3418        | 574.3397               | 3.7                   | 23.99           | 7a                     | ω-7                    |
| 686.4772      | 686.4766             | 0.9       | 19.69    | PE        | 16:1         | 253.2174 | 253.2173   | 0.4       | 16:1         | 253.2174 | 253.2173   | 0.4       | 576.364         | 576.3671               | -5.4                  | 600.3627        | 600.3671               | -7.3                  | 24.00           | 9a, 9a                 | ω-7, ω-7               |
| 745.5051      | 745.5025             | 3.5       | 19.84    | PG        | 16:1         | 253.2175 | 253.2173   | 0.8       | 18:1         | 281.2488 | 281.2486   | 0.7       | 635.3879        | 635.393                | -8.0                  | 659.3923        | 659.393                | -1.1                  | 24.00           | 9a(16:1), 11a(18:1)    | ω-7, ω-7               |
| 733.5051      | 733.5025             | 3.5       | 21.75    | PG        | 16:1         | 253.2175 | 253.2173   | 0.8       | 17:0         | 269.2487 | 269.2486   | 0.4       | 609.3726        | 609.3773               | -7.7                  | 633.3804        | 633.3773               | 4.9                   | 24.01           | 8a                     | ω-8                    |
| 688.4974      | 688.4973             | 7.4       | 23.33    | PE        | 16:1         | 253.2194 | 253.2173   | 8.3       | 16:0         | 255.2335 | 255.2330   | 2.0       | 578.3769        | 578.3827               | -10.0                 | 602.3805        | 602.3827               | -3.7                  | 24.00           | 9a                     | ω-7                    |
| 714.5088      | 714.5079             | 1.3       | 24.50    | PE        | 16:1         | 253.2175 | 253.2173   | 0.8       | 18:1         | 281.2488 | 281.2486   | 0.7       | 604.3972        | 604.3984               | -2.0                  | 628.4002        | 628.3984               | 2.9                   | 24.00           | 9a(16:1), 11a(18:1)    | ω-7, ω-7               |
| 747.5193      | 747.5182             | 1.5       | 23.98    | PG        | 16:1         | 253.2177 | 253.2173   | 1.6       | 18:0         | 283.2646 | 283.2643   | 1.1       | 637.4127        | 637.4086               | 6.4                   | 661.4046        | 661.4086               | -6.0                  | 23.99           | 9a                     | ω-7                    |
| 716.5275      | 716.5236             | 5.4       | 28.77    | PE        | 16:0         | 255.234  | 255.2330   | 3.9       | 18:1         | 281.2498 | 281.2486   | 4.3       | 606.4196        | 606.414                | 9.2                   | 630.4099        | 630.414                | -6.5                  | 23.99           | 11a                    | ω-7                    |
| 716.524       |                      | 0.6       | 30.19    |           | 16:1         | 253.2174 | 253.2173   | 0.4       | 18:0         | 283.2644 | 283.2643   | 0.4       | 606.4142        | 606.414                | 0.3                   | 630.4128        | 630.414                | -1.9                  | 24.00           | 9a                     | ω-7                    |

**Table S8.** List of all identified unsaturated lipids in *V. cholera* lipid extract with all precursor and fragment ion ppm error values for acyl chain product ions and unsaturation element fragment ions (within 10 ppm error). Features are color coded by headgroup (PGs in red, PEs in yellow, PCs in purple), unsaturation type (cyclopropane rings in blue, double bonds in green), and unique acyl chain modifications (odd-carbon branched acyl chains in pink, hydroxyl acyl chains in brown).

## *S. marcescens*

| Precursor $m/z$ | Precursor $m/z$ (theo) | ppm error | RT (min) | Headgroup | acyl chain 1 | $m/z$    | $m/z$ (theo) | ppm error | acyl chain 2 | $m/z$    | $m/z$ (theo) | ppm error | Unsat Ion 1 $m/z$ | Unsat Ion 1 $m/z$ (theo) | Unsat Ion 1 ppm error | Unsat Ion 2 $m/z$ | Unsat Ion 2 $m/z$ (theo) | Unsat Ion 2 ppm error | Difference (Da) | Unsat Position (Delta) | Unsat Position (Omega) |
|-----------------|------------------------|-----------|----------|-----------|--------------|----------|--------------|-----------|--------------|----------|--------------|-----------|-------------------|--------------------------|-----------------------|-------------------|--------------------------|-----------------------|-----------------|------------------------|------------------------|
| 717.4711        | 717.4712               | -0.1      | 15.82    | PG        | 16:1         | 253.2173 | 253.2173     | 0.0       | 16:1         | 253.2173 | 253.2173     | 0.0       | 607.3582          | 607.3617                 | -5.8                  | 631.3618          | 631.3617                 | 0.2                   | 24.00           | 9a, 9a                 | $\omega-7, \omega-7$   |
| 705.4710        | 705.4712               | -0.3      | 17.53    | PG        | 14:0         | 227.2016 | 227.2017     | -0.4      | 17:1         | 267.2329 | 267.2330     | -0.4      | 593.342           | 593.346                  | -6.7                  | 607.3587          | 607.3617                 | -4.9                  | 14.02           | 9a                     | $\omega-7$             |
| 686.4782        | 686.4766               | 2.3       | 19.16    | PE        | 16:1         | 253.2176 | 253.2173     | 1.2       | 16:1         | 253.2176 | 253.2173     | 1.2       | 576.3704          | 576.3671                 | 5.7                   | 600.3626          | 600.3671                 | -7.5                  | 23.99           | 9a, 9a                 | $\omega-7, \omega-7$   |
| 674.4767        | 674.4766               | 0.1       | 20.70    | PE        | 15:0         | 241.2173 | 241.2173     | 0.0       | 16:1         | 253.2173 | 253.2173     | 0.0       | 564.3691          | 564.3671                 | 3.5                   | 588.3692          | 588.3671                 | 3.6                   | 24.00           | 9a                     | $\omega-7$             |
| 674.4777        |                        | 1.6       | 21.37    |           | 14:0         | 227.2019 | 227.2017     | 0.9       | 17:1         | 267.2332 | 267.2330     | 0.7       | 562.3506          | 562.3514                 | -1.4                  | 576.3652          | 576.3671                 | -3.3                  | 14.01           | 9a                     | $\omega-7$             |
| 733.5068        | 733.5025               | 5.9       | 21.76    | PG        | 16:0         | 255.2339 | 255.2330     | 3.5       | 17:1         | 267.2341 | 267.2330     | 4.1       | 621.3763          | 621.3773                 | -1.6                  | 635.3918          | 635.393                  | -1.9                  | 14.02           | 9a                     | $\omega-7$             |
| 714.5082        | 714.5079               | 0.4       | 23.33    | PE        | 17:1         | 267.233  | 267.2330     | 0.0       | 17:1         | 267.233  | 267.2330     | 0.0       | 602.3804          | 602.3827                 | -3.8                  | 616.3964          | 616.3984                 | -3.2                  | 14.02           | 9a, 9a                 | $\omega-7, \omega-7$   |
| 688.4931        | 688.4923               | 1.2       | 24.18    | PE        | 15:0         | 241.2175 | 241.2173     | 0.8       | 17:1         | 267.2331 | 267.2330     | 0.4       | 576.3672          | 576.3671                 | 0.2                   | 590.3781          | 590.3827                 | -7.8                  | 14.01           | 9a                     | $\omega-7$             |
| 702.5086        | 702.5079               | 1.0       | 26.22    | PE        | 16:1         | 253.2175 | 253.2173     | 0.8       | 17:0         | 269.2487 | 269.2486     | 0.4       | 592.3994          | 592.3984                 | 1.7                   | 616.3947          | 616.3984                 | -6.0                  | 24.00           | 9a                     | $\omega-7$             |
| 702.5084        |                        | 0.7       | 26.72    |           | 16:0         | 255.233  | 255.2330     | 0.0       | 17:1         | 267.2330 | 267.2330     | 0.0       | 590.3792          | 590.3827                 | -5.9                  | 604.3984          | 604.3984                 | 0.0                   | 14.02           | 9a                     | $\omega-7$             |
| 716.5248        | 716.5236               | 1.7       | 28.68    | PE        | 16:0         | 255.2332 | 255.2330     | 0.8       | 18:1         | 281.2490 | 281.2486     | 1.4       | 606.4199          | 606.414                  | 9.7                   | 630.4133          | 630.414                  | -1.1                  | 23.99           | 11a                    | $\omega-7$             |
| 716.5242        |                        | 0.8       | 29.31    |           | 16:1         | 253.2175 | 253.2173     | 0.8       | 18:0         | 283.2644 | 283.2643     | 0.4       | 606.4144          | 606.414                  | 0.7                   | 630.4102          | 630.414                  | -6.0                  | 24.00           | 9a                     | $\omega-7$             |
| 730.5394        | 730.5392               | 0.3       | 33.25    | PE        | 16:0         | 255.2329 | 255.2330     | -0.4      | 19:1         | 295.2642 | 295.2639     | 1.0       | 618.4095          | 618.414                  | -7.3                  | 632.4277          | 632.4297                 | -3.2                  | 14.02           | 11a                    | $\omega-7$             |
| 730.5392        |                        | 0.0       | 33.48    |           | 17:1         | 267.2329 | 267.2330     | -0.4      | 18:0         | 283.2642 | 283.2643     | 0.4       | 618.4093          | 618.414                  | -7.6                  | 632.4289          | 632.4297                 | -1.3                  | 14.02           | 9a                     | $\omega-7$             |

**Table S9.** List of all identified unsaturated lipids in *S. marcescens* lipid extract with all precursor and fragment ion ppm error values for acyl chain product ions and unsaturation element fragment ions (within 10 ppm error). Features are color coded by headgroup (PGs in red, PEs in yellow, PCs in purple), unsaturation type (cyclopropane rings in blue, double bonds in green), and unique acyl chain modifications (odd-carbon branched acyl chains in pink, hydroxyl acyl chains in brown).



## C. jejuni

| Precursor m/z | Precursor m/z (theo) | ppm error | RT (min) | Headgroup | acyl chain 1 | m/z      | m/z (theo) | ppm error | acyl chain 2 | m/z      | m/z (theo) | ppm error | Unsat Ion 1 m/z | Unsat Ion 1 m/z (theo) | Unsat Ion 1 ppm error | Unsat Ion 2 m/z | Unsat Ion 2 m/z (theo) | Unsat Ion 2 ppm error | Difference (Da) | Unsat Position (Delta) | Unsat Position (Omega) |
|---------------|----------------------|-----------|----------|-----------|--------------|----------|------------|-----------|--------------|----------|------------|-----------|-----------------|------------------------|-----------------------|-----------------|------------------------|-----------------------|-----------------|------------------------|------------------------|
| 677.4418      | 677.4399             | 2.8       | 13.55    | PG        | 13:0         | 213.1864 | 213.1860   | 1.9       | 16:1         | 253.2178 | 253.2173   | 2.0       | 581.3453        | 581.346                | -1.2                  | 605.3495        | 605.346                | 5.8                   | 24.00           | 10Δ                    | ω-6                    |
| 660.4642      | 660.4610             | 4.8       | 18.52    | PE        | 14:0         | 227.2023 | 227.2017   | 2.6       | 16:1         | 253.2182 | 253.2173   | 3.6       | 550.348         | 550.3467               | 2.4                   | 574.3443        | 574.3397               | 8.0                   | 24.00           | 9Δ                     | ω-7                    |
| 674.4768      | 674.4766             | 0.3       | 21.78    | PE        | 14:0         | 227.2015 | 227.2017   | -0.9      | 17:1         | 267.2328 | 267.2330   | 0.7       | 562.3477        | 562.3514               | -6.6                  | 576.3614        | 576.3671               | -9.9                  | 14.01           | 9Δ                     | ω-7                    |
| 733.5026      | 733.5025             | 0.1       | 21.93    | PG        | 14:0         | 227.2017 | 227.2017   | 0.0       | 19:1         | 295.2643 | 295.2639   | 1.4       | 621.3738        | 621.3773               | -5.6                  | 635.39          | 635.393                | -4.7                  | 14.02           | 11Δ                    | ω-7                    |
| 747.5183      | 747.5182             | 0.1       | 24.18    | PG        | 15:0         | 241.2172 | 241.2173   | -0.4      | 19:1         | 295.2641 | 295.2639   | 0.7       | 635.389         | 635.393                | -6.3                  | 649.4072        | 649.4086               | -2.2                  | 14.02           | 11Δ                    | ω-7                    |
| 773.5346      | 773.5338             | 1.0       | 25.78    | PG        | 17:1         | 267.2331 | 267.2330   | 0.4       | 19:1         | 295.2644 | 295.2639   | 1.7       | 661.4062        | 661.4086               | -3.6                  | 675.4211        | 675.4243               | -4.7                  | 14.01           | 9Δ(17:1), 11Δ(19:1)    | ω-7, ω-7               |
| 702.5077      | 702.5079             | -0.3      | 26.15    | PE        | 16:0         | 255.2328 | 255.2330   | -0.8      | 17:1         | 267.2329 | 267.2330   | -0.4      | 590.3789        | 590.3827               | -6.4                  | 604.3966        | 604.3984               | -3.0                  | 14.02           | 9Δ                     | ω-7                    |
|               |                      |           |          |           | 14:0         | 227.2015 | 227.2017   | -0.9      | 19:1         | 295.2641 | 295.2639   | 0.7       |                 |                        |                       |                 |                        |                       |                 | 9Δ                     | ω-7                    |
| 761.5363      | 761.5338             | 3.3       | 26.98    | PG        | 16:0         | 255.2336 | 255.2330   | 2.4       | 19:1         | 295.2650 | 295.2639   | 3.7       | 649.4074        | 649.4086               | -1.8                  | 663.423         | 663.4243               | -2.0                  | 14.02           | 11Δ                    | ω-7                    |
|               |                      |           |          |           |              |          |            |           |              |          |            |           | 677.4359        | 677.4399               | -5.9                  | 701.4364        | 701.4399               | -5.0                  | 24.00           |                        |                        |
| 787.5554      | 787.5495             | 7.5       | 27.75    | PG        | 18:1         | 281.2486 | 281.2486   | 0.0       | 19:1         | 295.2647 | 295.2639   | 1.0       | 675.4269        | 675.4243               | 3.8                   | 689.4424        | 689.4399               | 3.6                   | 14.02           | 11Δ, 11A               | ω-7, ω-7               |
| 716.5268      |                      | 4.5       | 29.00    |           | 16:0         | 255.2337 | 255.2330   | 2.7       | 18:1         | 281.2495 | 281.2486   | 3.2       | 606.4193        | 606.414                | 8.7                   | 630.4116        | 630.414                | -3.8                  | 23.99           | 11Δ                    | ω-7                    |
|               | 716.5236             |           |          | PE        |              |          |            |           |              |          |            |           |                 |                        |                       |                 |                        |                       |                 |                        |                        |
| 716.5237      |                      | 0.1       | 29.22    |           | 15:0         | 241.2173 | 241.2173   | 0.0       | 19:1         | 295.2642 | 295.2639   | 1.0       | 604.3936        | 604.3984               | -7.9                  | 618.4126        | 618.414                | -2.3                  | 14.02           | 11Δ                    | ω-7                    |
| 801.5648      | 801.5651             | -0.4      | 31.47    | PG        | 19:1         | 295.2642 | 295.2639   | 1.0       | 19:1         | 295.2642 | 295.2639   | 1.0       | 689.4373        | 689.4399               | -3.8                  | 703.4528        | 703.4556               | -4.0                  | 14.02           | 11Δ, 11A               | ω-7, ω-7               |
| 742.5408      | 742.5392             | 2.2       | 31.77    | PE        | 17:1         | 267.2333 | 267.2330   | -1.1      | 19:1         | 295.2647 | 295.2639   | 2.7       | 630.4128        | 630.414                | -1.9                  | 644.4274        | 644.4297               | -3.6                  | 14.01           | 9Δ(17:1), 11Δ(19:1)    | ω-7                    |
| 730.5396      | 730.5392             | 0.5       | 33.03    | PE        | 16:0         | 255.2329 | 255.2330   | -0.4      | 19:1         | 295.2642 | 295.2639   | 1.0       | 618.41          | 618.414                | -6.5                  | 632.4285        | 632.4297               | -1.9                  | 14.02           | 11Δ                    | ω-7                    |
| 756.5590      | 756.5549             | 5.4       | 33.94    | PE        | 18:1         | 281.2497 | 281.2486   | 3.9       | 19:1         | 295.2654 | 295.2639   | 5.1       | 646.4465        | 646.4453               | 1.9                   | 670.4501        | 670.4453               | 7.2                   | 24.00           | 11Δ, 11A               | ω-7, ω-7               |
|               |                      |           |          |           |              |          |            |           |              |          |            |           | 644.4273        | 644.4297               | -3.7                  | 658.4449        | 658.4453               | -0.6                  | 14.02           |                        |                        |
| 744.5552      | 744.5549             | 0.4       | 36.76    | PE        | 17:0         | 269.2486 | 269.2486   | 0.0       | 19:1         | 295.2642 | 295.2639   | 1.0       | 632.4274        | 632.4297               | -3.6                  | 646.4445        | 646.4453               | -1.2                  | 14.02           | 11Δ                    | ω-7                    |
| 770.5707      | 770.5705             | 0.3       | 38.31    | PE        | 19:1         | 295.2642 | 295.2639   | 1.0       | 19:1         | 295.2642 | 295.2639   | 1.0       | 658.4432        | 658.4453               | -3.2                  | 672.4582        | 672.461                | -4.2                  | 14.02           | 11Δ, 11A               | ω-7, ω-7               |
| 758.5665      | 758.5705             | -5.3      | 40.27    | PE        | 18:0         | 283.2643 | 283.2643   | 0.0       | 19:1         | 295.2642 | 295.2639   | 1.0       | 646.4418        | 646.4453               | -5.4                  | 660.4597        | 660.461                | -2.0                  | 14.02           | 11A                    | ω-7                    |

**Table S10.** List of all identified unsaturated lipids in *C. jejuni* lipid extract with all precursor and fragment ion ppm error values for acyl chain product ions and unsaturation element fragment ions (within 10 ppm error). Features are color coded by headgroup (PGs in red, PEs in yellow, PCs in purple), unsaturation type (cyclopropane rings in blue, double bonds in green), and unique acyl chain modifications (odd-carbon branched acyl chains in pink, hydroxyl acyl chains in brown).

## *Y. pseudotuberculosis*

| Precursor $m/z$ | Precursor $m/z$ (theo) | ppm error | RT (min) | Headgroup | acyl chain 1 | $m/z$   | $m/z$ (theo) | ppm error | acyl chain 2 | $m/z$    | $m/z$ (theo) | ppm error | Unsat Ion 1 $m/z$ | Unsat Ion 1 $m/z$ (theo) | Unsat Ion 1 ppm error | Unsat Ion 2 $m/z$ | Unsat Ion 2 $m/z$ (theo) | Unsat Ion 2 ppm error | Difference (Da) | Unsat Position (Delta) | Unsat Position (Omega) |
|-----------------|------------------------|-----------|----------|-----------|--------------|---------|--------------|-----------|--------------|----------|--------------|-----------|-------------------|--------------------------|-----------------------|-------------------|--------------------------|-----------------------|-----------------|------------------------|------------------------|
| 676.4567        | 676.4559               | 1.2       | 13.82    | PE        | 14:0 OH      | 243.196 | 243.196      | -0.4      | 16:1         | 253.2173 | 253.2173     | 0.0       | 566.3472          | 566.3463                 | 1.6                   | 590.35            | 590.3463                 | 6.3                   | 24.00           | 9Δ                     | ω-7                    |
| 632.4327        | 632.4297               | 4.7       | 14.83    | PE        | 12:0         | 199.171 | 199.170      | 3.0       | 16:1         | 253.2180 | 253.2173     | 2.8       | 522.3246          | 522.3201                 | 8.6                   | 546.316           | 546.3201                 | -7.5                  | 23.99           | 9Δ                     | ω-7                    |
| 691.4562        | 691.4556               | 0.9       | 15.42    | PG        | 14:0         | 227.201 | 227.201      | 0.4       | 16:1         | 253.2175 | 253.2173     | 0.8       | 581.3476          | 581.346                  | 2.8                   | 605.3427          | 605.346                  | -5.5                  | 24.00           | 9Δ                     | ω-7                    |
| 690.4733        | 690.4715               | 2.6       | 15.81    | PE        | 14:0 OH      | 243.196 | 243.196      | -0.4      | 17:1         | 267.2329 | 267.2330     | -0.4      | 578.3415          | 578.3463                 | -8.3                  | 592.3597          | 592.362                  | -3.0                  | 14.02           | 9Δ                     | ω-7                    |
| 646.4455        | 646.4453               | 0.3       | 16.97    | PE        | 12:0         | 199.170 | 199.170      | -0.5      | 17:1         | 267.2329 | 267.2330     | -0.4      | 534.3186          | 534.3201                 | -2.8                  | 548.3329          | 548.3358                 | -5.3                  | 14.01           | 9Δ                     | ω-7                    |
| 674.4780        | 674.4766               | 2.1       | 21.40    | PE        | 14:0         | 227.202 | 227.201      | 1.3       | 17:1         | 267.2333 | 267.2330     | 1.1       | 562.3508          | 562.3514                 | -1.1                  | 576.3653          | 576.3671                 | -3.1                  | 14.01           | 9Δ                     | ω-7                    |
| 733.5037        | 733.5025               | 1.6       | 21.77    | PG        | 16:0         | 255.233 | 255.233      | 0.8       | 17:1         | 267.2333 | 267.2330     | 1.1       | 621.3754          | 621.3773                 | -3.1                  | 635.3909          | 635.393                  | -3.3                  | 14.02           | 9Δ                     | ω-7                    |
| 700.4961        | 700.4923               | 5.4       | 22.14    | PE        | 16:1         | 253.218 | 253.217      | 3.2       | 17:1         | 267.2339 | 267.2330     | 3.4       | 590.3809          | 590.3827                 | -8.0                  | 614.3834          | 614.3827                 | 1.1                   | 24.00           | 9Δ, 9Δ                 | ω-7, ω-7               |
| 714.5082        | 714.5079               | 0.4       | 25.50    | PE        | 17:1         | 267.233 | 267.233      | 0.0       | 17:1         | 267.233  | 267.2330     | 0.0       | 588.3669          | 588.3671                 | -0.3                  | 602.3801          | 602.3827                 | -4.3                  | 14.01           | 9Δ, 9Δ                 | ω-7, ω-7               |
| 702.5081        | 702.5079               | 0.3       | 26.74    | PE        | 16:0         | 255.232 | 255.233      | -0.4      | 17:1         | 267.2329 | 267.2330     | -0.4      | 602.3802          | 602.3827                 | -4.2                  | 616.3962          | 616.3984                 | -3.6                  | 14.02           | 9Δ, 9Δ                 | ω-7, ω-7               |
| 716.5250        | 716.5236               | 2.0       | 28.80    | PE        | 16:0         | 255.233 | 255.233      | 1.2       | 17:1         | 267.2329 | 267.2330     | -0.4      | 590.3791          | 590.3827                 | -6.1                  | 604.3982          | 604.3984                 | -0.3                  | 14.02           | 9Δ                     | ω-7                    |
| 716.5246        | 716.5236               | 1.4       | 29.26    | PE        | 16:1         | 253.217 | 253.217      | 1.2       | 18:0         | 283.2646 | 283.2643     | 1.1       | 606.4179          | 606.414                  | 6.4                   | 630.4126          | 630.414                  | -2.2                  | 23.99           | 11Δ                    | ω-7                    |
| 742.5399        | 742.5392               | 0.9       | 29.34    | PE        | 18:1         | 281.248 | 281.248      | 0.4       | 18:1         | 281.2487 | 281.2486     | 0.4       | 606.4161          | 606.414                  | 3.5                   | 630.4119          | 630.414                  | -3.3                  | 24.00           | 9Δ                     | ω-7                    |
|                 |                        |           |          |           |              | 281.248 | 281.248      | 0.4       | 18:1         | 281.2487 | 281.2486     | 0.4       | 632.4252          | 632.4297                 | -7.1                  | 656.4295          | 656.4297                 | -0.3                  | 24.00           | 11Δ, 11Δ               | ω-7                    |

**Table S11.** List of all identified unsaturated lipids in *Y. pseudotuberculosis* lipid extract with all precursor and fragment ion ppm error values for acyl chain product ions and unsaturation element fragment ions (within 10 ppm error). Features are color coded by headgroup (PGs in red, PEs in yellow, PCs in purple), unsaturation type (cyclopropane rings in blue, double bonds in green), and unique acyl chain modifications (odd-carbon branched acyl chains in pink, hydroxyl acyl chains in brown).

## B. subtilis

| Precursor $m/z$ | Precursor $m/z$ (theo) | ppm error | RT (min) | Headgroup | acyl chain 1 | $m/z$    | $m/z$ (theo) | ppm error | acyl chain 2 | $m/z$    | $m/z$ (theo) | ppm error | Unsat Ion 1 $m/z$ | Unsat Ion 1 $m/z$ (theo) | Unsat Ion 1 ppm error | Unsat Ion 2 $m/z$ | Unsat Ion 2 $m/z$ (theo) | Unsat Ion 2 ppm error | Difference (Da) | Unsat Position (Delta) | Unsat Position (Omega) |
|-----------------|------------------------|-----------|----------|-----------|--------------|----------|--------------|-----------|--------------|----------|--------------|-----------|-------------------|--------------------------|-----------------------|-------------------|--------------------------|-----------------------|-----------------|------------------------|------------------------|
| 688.4948        | 688.4923               | 3.6       | 23.39    | PE        | 16:1         | 253.2181 | 253.2173     | 3.2       | 16:0         | 255.2330 | 255.2330     | 0.0       | 578.3781          | 578.3827                 | -8.0                  | 602.3813          | 602.3827                 | -2.3                  | 24.00           | 9Δ                     | ω-7                    |
| 714.5082        | 714.5079               | 0.4       | 24.12    | PE        | 16:1         | 253.2174 | 253.2173     | 0.4       | 18:1         | 281.2487 | 281.2486     | 0.4       | 604.399           | 604.3984                 | 1.0                   | 628.403           | 628.3984                 | 7.3                   | 24.00           | 9Δ(16:1),<br>11Δ(16:1) | ω-7, ω-7               |
| 702.5092        | 702.5079               | 1.9       | 27.00    | PE        | 16:0         | 255.2332 | 255.2330     | 0.8       | 17:1         | 267.2332 | 267.2330     | 0.7       | 590.3793          | 590.3827                 | -5.8                  | 604.3984          | 604.3984                 | 0.0                   | 14.02           | 9Δ                     | ω-7                    |

**Table S12.** List of all identified unsaturated lipids in *B. subtilis* lipid extract with all precursor and fragment ion ppm error values for acyl chain product ions and unsaturation element fragment ions (within 10 ppm error). Features are color coded by headgroup (PGs in red, PEs in yellow, PCs in purple), unsaturation type (cyclopropane rings in blue, double bonds in green), and unique acyl chain modifications (odd-carbon branched acyl chains in pink, hydroxyl acyl chains in brown).

## *L. plantarum*

| Precursor m/z | Precursor m/z (theo) | ppm error | RT (min) | Headgroup | acyl chain 1 | m/z  | m/z (theo)   | ppm error    | acyl chain 2 | m/z  | m/z (theo) | ppm error | Unsat Ion 1 m/z | Unsat Ion 1 m/z (theo) | Unsat Ion 1 ppm error | Unsat Ion 2 m/z | Unsat Ion 2 m/z (theo) | Unsat Ion 2 ppm error | Difference (Da) | Unsat Position (Delta) | Unsat Position (Omega) | Precursor m/z |
|---------------|----------------------|-----------|----------|-----------|--------------|------|--------------|--------------|--------------|------|------------|-----------|-----------------|------------------------|-----------------------|-----------------|------------------------|-----------------------|-----------------|------------------------|------------------------|---------------|
| 717.4712      | 717.4712             | 0.0       | 1823     | 15.85     | PG           | 16:1 | 253.217<br>3 | 253.217<br>3 | 0.0          | 16:1 | 253.2173   | 253.2173  | 0.0             | 607.3586               | 607.3617              | -5.1            | 631.3595               | 631.3617              | -3.5            | 24.00                  | 9Δ                     | ω-7           |
| 719.4888      | 719.4869             | 2.6       | 2015     | 18.80     | PG           | 14:0 | 227.202<br>1 | 227.201<br>7 | 1.8          | 18:1 | 281.2492   | 281.2486  | 2.1             | 609.3845               | 609.3773              | 11.8            | 633.3824               | 633.3773              | 8.1             | 24.00                  | 11Δ                    | ω-7           |
| 719.4879      | 719.4869             | 1.4       | 2024     | 19.03     | PG           | 16:1 | 253.217<br>7 | 253.217<br>3 | 1.6          | 16:0 | 255.233    | 255.2330  | 0.0             | 609.3815               | 609.3773              | 6.9             | 633.3845               | 633.3773              | 11.4            | 24.00                  | 9Δ                     | ω-7           |
| 745.5040      | 745.5025             | 2.0       | 2067     | 20.23     | PG           | 16:1 | 253.217<br>9 | 253.217<br>3 | 2.4          | 18:1 | 281.2491   | 281.2486  | 1.8             | 635.3878               | 635.393               | -8.2            | 659.3986               | 659.393               | 8.5             | 24.01                  | 9Δ(16:1),<br>11Δ(18:1) | ω-7, ω-7      |
| 733.5024      | 733.5025             | -0.1      | 2128     | 21.70     | PG           | 14:0 | 227.201<br>6 | 227.201<br>7 | -0.4         | 19:1 | 295.2642   | 295.2639  | 1.0             | 621.3737               | 621.3773              | -5.8            | 635.3885               | 635.393               | -7.1            | 14.01                  | 11Δ                    | ω-7           |
| 747.5201      | 747.5182             | 2.5       | 2227     | 24.59     | PG           | 16:1 | 253.217<br>4 | 253.217<br>3 | 0.4          | 18:0 | 283.2643   | 283.2643  | 0.0             | 637.4096               | 637.4086              | 1.6             | 661.4095               | 661.4086              | 1.4             | 24.00                  | 9Δ                     | ω-7           |
|               |                      |           |          |           |              | 16:0 | 255.232<br>9 | 255.233<br>0 | -0.4         | 18:1 | 281.2487   | 281.2486  | 0.4             | 649.4067               | 649.4086              | -2.9            | 663.4225               | 663.4243              | -2.7            | 14.02                  | 11Δ                    | ω-7           |
| 761.5354      | 761.5338             | 2.1       | 2333     | 27.45     | PG           | 16:0 | 255.233<br>4 | 255.233<br>0 | 1.6          | 19:1 | 295.2647   | 295.2639  | 2.7             | 621.3784               | 621.3773              | 1.8             | 635.3928               | 635.393               | -0.3            | 14.01                  | 9Δ                     | ω-9           |
| 775.5500      | 775.5495             | 0.6       | 2396     | 29.02     | PG           | 18:1 | 281.248<br>9 | 281.248<br>6 | 1.1          | 18:0 | 283.2643   | 283.2643  | 0.0             | 665.4409               | 665.4399              | 1.5             | 689.4399               | 689.4399              | 0.0             | 24.00                  | 11Δ                    | ω-7           |

**Table S13.** List of all identified unsaturated lipids in *L. plantarum* lipid extract with all precursor and fragment ion ppm error values for acyl chain product ions and unsaturation element fragment ions (within 10 ppm error). Features are color coded by headgroup (PGs in red, PEs in yellow, PCs in purple), unsaturation type (cyclopropane rings in blue, double bonds in green), and unique acyl chain modifications (odd-carbon branched acyl chains in pink, hydroxyl acyl chains in brown).

## Polyunsaturated fatty acids within GPLs

| Acyl Chain | $m/z_{\text{theoretical}}$ | $m/z_{\text{observed}}$       | error (ppm) | Sample                                 |
|------------|----------------------------|-------------------------------|-------------|----------------------------------------|
| 11:2 OH    | 197.1183                   | 197.1183                      | 0.00        | <i>Escherichia coli</i>                |
|            |                            | 197.1183                      | 0.00        | <i>Salmonella enterica Typhimurium</i> |
| 16:4       | 247.1704                   | 247.1705                      | 0.40        | <i>Klebsiella pneumoniae</i>           |
|            |                            | 247.1705                      | 0.40        | <i>Bacillus subtilis</i>               |
| 16:2       | 251.2017                   | 251.2016                      | -0.40       | <i>Klebsiella pneumoniae</i>           |
|            |                            | 251.2019                      | 0.80        | <i>Proteus mirabilis</i>               |
|            |                            | 251.2017                      | 0.00        | <i>Vibrio cholerae</i>                 |
|            |                            | 251.2017                      | 0.00        | <i>Lactobacillus plantarum</i>         |
|            |                            | 251.2013                      | -1.59       | <i>Escherichia coli</i>                |
| 16:3 OH    | 265.1809                   | 251.2016                      | -0.40       | <i>Pseudomonas aeruginosa</i>          |
|            |                            | 265.1810                      | 0.38        | <i>Vibrio cholerae</i>                 |
|            |                            | 265.1810                      | 0.38        | <i>Escherichia coli</i>                |
| 17:2       | 265.2173                   | 265.2173                      | 0.00        | <i>Klebsiella pneumoniae</i>           |
| 16:2 OH    | 267.1967                   | 267.1966                      | 0.37        | <i>Escherichia coli</i>                |
|            |                            | 267.1966                      | 0.37        | <i>Enterobacter cloacae</i>            |
| 18:4       | 275.2017                   | 275.2017                      | 0.00        | <i>Klebsiella pneumoniae</i>           |
|            |                            | 275.2018                      | 0.36        | <i>Bacillus subtilis</i>               |
| 18:3       | 277.2173                   | 277.2171                      | -0.72       | <i>Campylobacter jejuni</i>            |
| 18:2       | 279.2330                   | 279.2329                      | -0.36       | <i>Klebsiella pneumoniae</i>           |
|            |                            | 279.2328                      | -0.72       | <i>Proteus mirabilis</i>               |
|            |                            | 279.233                       | 0.00        | <i>Vibrio cholerae</i>                 |
|            |                            | 279.2328                      | -0.72       | <i>Campylobacter jejuni</i>            |
|            |                            | 279.2329                      | -0.36       | <i>Escherichia coli</i>                |
|            |                            | 279.2331                      | 0.36        | <i>Lactobacillus plantarum</i>         |
|            |                            | 279.2327                      | -1.07       | <i>Enterobacter cloacae</i>            |
| 279.2330   | 0.00                       | <i>Pseudomonas aeruginosa</i> |             |                                        |
| 19:2       | 293.2486                   | 293.2486                      | 0.00        | <i>Klebsiella pneumoniae</i>           |
| 18:2 OH    | 295.2279                   | 295.2281                      | 0.68        | <i>Vibrio cholerae</i>                 |
|            |                            | 295.2277                      | -0.68       | <i>Escherichia coli</i>                |
|            |                            | 295.2277                      | -0.68       | <i>Yersinia pseudotuberculosis</i>     |
| 20:4       | 303.2330                   | 303.2330                      | 0.00        | <i>Klebsiella pneumoniae</i>           |

**Table S14.** List of identified polyunsaturated fatty acids (PUFAs) within GPLs with observed and theoretical acyl chain product ion  $m/z$  values along with the bacterial lipid extract they were identified in.

## Hydroxyl fatty acids within GPLs

| Acyl Chain | $m/z_{\text{theoretical}}$ | $m/z_{\text{observed}}$ | error (ppm) | Sample                                 |
|------------|----------------------------|-------------------------|-------------|----------------------------------------|
| 8:1 OH     | 157.0870                   | 157.0870                | 0.00        | <i>Escherichia coli</i>                |
| 9:1 OH     | 171.1027                   | 171.1027                | 0.00        | <i>Escherichia coli</i>                |
|            |                            | 171.1027                | 0.00        | <i>Enterobacter cloacae</i>            |
|            |                            | 171.1027                | 0.00        | <i>Klebsiella pneumoniae</i>           |
|            |                            | 171.1027                | 0.00        | <i>Proteus mirabilis</i>               |
|            |                            | 171.1028                | -0.58       | <i>Salmonella enterica Typhimurium</i> |
|            |                            | 171.1027                | 0.00        | <i>Vibrio cholerae</i>                 |
|            |                            | 171.1026                | 0.58        | <i>Serratia marcescens</i>             |
|            |                            | 171.1026                | 0.58        | <i>Yersinia pseudotuberculosis</i>     |
| 10:0 OH    | 187.1340                   | 187.1339                | 0.53        | <i>Escherichia coli</i>                |
|            |                            | 187.1340                | 0.00        | <i>Proteus mirabilis</i>               |
|            |                            | 187.1340                | 0.00        | <i>Salmonella enterica Typhimurium</i> |
|            |                            | 187.1340                | 0.00        | <i>Yersinia pseudotuberculosis</i>     |
| 11:2 OH    | 197.1183                   | 197.1183                | 0.00        | <i>Escherichia coli</i>                |
| 11:1 OH    | 199.1340                   | 199.1339                | 0.50        | <i>Salmonella enterica Typhimurium</i> |
| 12:1 OH    | 213.1496                   | 213.1496                | 0.00        | <i>Escherichia coli</i>                |
|            |                            | 213.1496                | 0.00        | <i>Proteus mirabilis</i>               |
| 12:0 OH    | 215.1653                   | 215.1653                | 0.00        | <i>Escherichia coli</i>                |
|            |                            | 215.1655                | -0.93       | <i>Proteus mirabilis</i>               |
|            |                            | 215.1654                | -0.46       | <i>Salmonella enterica Typhimurium</i> |
| 14:1 OH    | 241.1809                   | 241.1811                | -0.83       | <i>Proteus mirabilis</i>               |
|            |                            | 241.1811                | -0.83       | <i>Vibrio cholerae</i>                 |
|            |                            | 243.1966                | 0.00        | <i>Escherichia coli</i>                |
| 14:0 OH    | 243.1966                   | 243.1966                | 0.00        | <i>Proteus mirabilis</i>               |
|            |                            | 243.1967                | -0.41       | <i>Salmonella enterica Typhimurium</i> |
|            |                            | 243.1969                | -1.23       | <i>Vibrio cholerae</i>                 |
|            |                            | 243.1965                | 0.41        | <i>Yersinia pseudotuberculosis</i>     |
| 16:3 OH    | 265.1809                   | 265.1810                | -0.38       | <i>Vibrio cholerae</i>                 |
|            |                            | 265.1810                | -0.38       | <i>Escherichia coli</i>                |
|            |                            | 267.1967                | -0.37       | <i>Escherichia coli</i>                |
|            |                            | 267.1966                | 0.00        | <i>Enterobacter cloacae</i>            |
| 16:2 OH    | 267.1966                   | 267.1965                | 0.37        | <i>Salmonella enterica Typhimurium</i> |
|            |                            | 267.1967                | -0.37       | <i>Vibrio cholerae</i>                 |
|            |                            | 267.1967                | -0.37       | <i>Serratia marcescens</i>             |
|            |                            | 267.1966                | 0.00        | <i>Yersinia pseudotuberculosis</i>     |
|            |                            | 269.2124                | -0.74       | <i>Escherichia coli</i>                |
|            |                            | 269.2121                | 0.37        | <i>Klebsiella pneumoniae</i>           |
|            |                            | 269.2123                | -0.37       | <i>Proteus mirabilis</i>               |
| 16:1 OH    | 269.2122                   | 269.2123                | -0.37       | <i>Pseudomonas aeruginosa</i>          |
|            |                            | 269.2121                | 0.37        | <i>Salmonella enterica Typhimurium</i> |
|            |                            | 269.2124                | -0.74       | <i>Vibrio cholerae</i>                 |
|            |                            | 269.2122                | 0.00        | <i>Serratia marcescens</i>             |
|            |                            | 269.2120                | 0.74        | <i>Yersinia pseudotuberculosis</i>     |
|            |                            | 271.2281                | -0.74       | <i>Proteus mirabilis</i>               |
| 16:0 OH    | 271.2279                   | 271.2277                | 0.74        | <i>Campylobacter jejuni</i>            |
|            |                            | 271.2278                | 0.37        | <i>Yersinia pseudotuberculosis</i>     |
|            |                            | 295.2281                | -0.68       | <i>Vibrio cholerae</i>                 |
| 18:2 OH    | 295.2279                   | 295.2277                | 0.68        | <i>Escherichia coli</i>                |
|            |                            | 295.2277                | 0.68        | <i>Yersinia pseudotuberculosis</i>     |
| 18:1 OH    | 297.2435                   | 297.2437                | -0.67       | <i>Proteus mirabilis</i>               |
|            |                            | 297.2436                | -0.34       | <i>Pseudomonas aeruginosa</i>          |
| 18:0 OH    | 299.2592                   | 299.2590                | 0.67        | <i>Vibrio cholerae</i>                 |

**Table S15.** List of identified hydroxyl acyl chains within GPLs with observed and theoretical acyl chain product ion  $m/z$  values along with the bacterial lipid extract they were identified in.

## Identifying hydroxyl fatty acids – isobaric acyl chains

| OH acyl chain | <i>m/z</i> | Unmodified acyl chain | <i>m/z</i> | Difference (Da) | Difference (ppm) |
|---------------|------------|-----------------------|------------|-----------------|------------------|
| 8:1 OH        | 157.0870   | 9:0                   | 157.1234   | 0.036           | 231.7            |
| 9:1 OH        | 171.1027   | 10:0                  | 171.1391   | 0.036           | 212.7            |
| 11:2 OH       | 197.1183   | 12:1                  | 197.1547   | 0.036           | 184.6            |
| 11:1 OH       | 199.1340   | 12:0                  | 199.1704   | 0.036           | 182.8            |
| 12:1 OH       | 213.1496   | 13:0                  | 213.186    | 0.036           | 170.8            |
| 14:1 OH       | 241.1809   | 15:0                  | 241.2173   | 0.036           | 150.9            |
| 16:3 OH       | 265.1809   | 17:2                  | 265.2173   | 0.036           | 137.3            |
| 16:2 OH       | 267.1966   | 17:1                  | 267.233    | 0.036           | 136.2            |
| 16:1 OH       | 269.2122   | 17:0                  | 269.2486   | 0.036           | 135.2            |
| 18:2 OH       | 295.2279   | 19:1                  | 295.2643   | 0.036           | 123.3            |
| 18:1 OH       | 297.2435   | 19:0                  | 297.2799   | 0.036           | 122.5            |

**Table S16.** List of identified OH acyl chains with their respective acyl chain product ion *m/z* values along with unmodified (non-hydroxyl) acyl chains which are isobaric with each hydroxyl acyl chain. The small difference in mass between hydroxyl acyl chains and unmodified acyl chains showcases the need for high-resolution high-mass accuracy instrumentation for identification of hydroxyl acyl chains.

## Lysyl-PGs in Gram-negative and Gram-positive bacteria

| Bacterium                      | Precursor $m/z$ (exp) | ID                 |
|--------------------------------|-----------------------|--------------------|
| <i>Campylobacter jejuni</i>    | 779.5192              | Lysyl PG 13:0_14:0 |
|                                | 793.535               | Lysyl PG 13:0_15:0 |
|                                | 807.5516              | Lysyl PG 13:0_16:0 |
|                                | 821.5665              | Lysyl PG 13:0_17:0 |
|                                | 835.5818              | Lysyl PG 15:0_16:0 |
| <i>Bacillus subtilis</i>       | 821.5665              | Lysyl PG 15:0/15:0 |
|                                | 821.5659              | Lysyl PG 15:0/15:0 |
| <i>Lactobacillus plantarum</i> | 875.6149              | Lysyl PG 16:0_18:1 |
|                                | 889.6292              | Lysyl PG 16:0_19:1 |
|                                | 877.6284              | Lysyl PG 16:0_18:0 |

**Table S17.** List of identified lysyl-PGs with their respective precursor  $m/z$  values in Gram-negative *C. jejuni* and Gram-positive *B. subtilis* and *L. plantarum*.
